1  
2  
3  
4  
5  
6  
7  
8  
9  
10  
11  
12  
13  
14  
15  
16  
17  
18  
19  
20  
21

**Mito-nuclear variation**  
**in transgenerational and reproductive effects**  
**of amino acid and lipid nutrition**

Adam J. Dobson<sup>a,b\*</sup>, Luisa Kumpitsch<sup>b</sup>, Lucas Langer<sup>b</sup>,  
Emmely Voigt<sup>b</sup>, Damian K. Dowling<sup>c</sup>, Klaus Reinhardt<sup>b\*</sup>

a - Institute of Molecular Cell & Systems Biology, College of Medical Veterinary & Life Sciences, Davidson Building, University of Glasgow, G12 8QQ, UK.

b - Applied Zoology, Faculty of Biology, Technische Universität Dresden, 01069 Dresden, Germany.

c - School of Biological Sciences, Monash University, Clayton, Victoria 3800, Australia.

\* correspondence: [adam.dobson@glasgow.ac.uk](mailto:adam.dobson@glasgow.ac.uk), [klaus.reinhardt@tu-dresden.de](mailto:klaus.reinhardt@tu-dresden.de)

22  
23  
24  
25  
26  
27  
28  
29  
30  
31  
32  
33  
34  
35  
36  
37  
38  
39

## Abstract

Animals vary genetically in responses to dietary change. Both mitochondrial and nuclear genomes contribute to this variation, but the role of combinatorial "mito-nuclear" genetic variation is understudied. We do not know whether specific nutrients modify patterns of mito-nuclear variation, nor whether putative epigenetic mechanisms play a role. Here, we show that enriching dietary essential amino acids or lipids modifies patterns of mito-nuclear variation in *Drosophila* life-history, including transgenerational effects of lipids. Systematically evaluating alternative statistical models revealed that diet-mito-nuclear interactions were a leading driver of phenotypic variation. Mito-nuclear genotype repeatably predicted phenotypic impacts of nutritional changes, but genotypes bearing naturally co-occurring pairs of mitochondria and nuclei did not necessarily outperform novel pairings, suggesting that nutrition-dependent phenotypes cannot easily be optimised by matching mitochondria to coincident nuclear genotypes. These results enhance understanding of how nutrition and genetics sculpt phenotype, with potential implications for human mitochondrial transfer therapies.

40

## Introduction

41

42 Nutrients and a genetic code are the fundamentals of cellular life. Consequently,  
43 variation in nutrition and genotype are primary determinants of variation in health and  
44 biological fitness. Nutritional and genetic variation can also interact, meaning that  
45 different genotypes can respond distinctly to the same nutritional change (Dobson et  
46 al., 2015; Heymsfield and Wadden, 2017; Jumbo-Lucioni et al., 2010; Liao et al.,  
47 2009; Mulvey et al., 2017; Rikke et al., 2010). Biomedically, the interactive effects of  
48 diet and human genetic variation have led to interest in personalised nutrition  
49 (Ordovas et al., 2018), in which diets would be targeted individually, to treat maladies  
50 such as obesity and late-life morbidity (Fontana et al., 2010; Heymsfield and  
51 Wadden, 2017; Simpson and Raubenheimer, 2012). Biologically, unravelling genetic  
52 variation in how fitness is affected by nutrition will be a major part of bridging the  
53 genotype-phenotype gap.

54

55 Why do responses to diet vary? Ultimately, cellular metabolic function is the output of  
56 the coordinate activity of enzymes encoded by both the mitochondrial and nuclear  
57 genome. Both genomes exhibit sequence variation, yet the consequences of  
58 mitochondrial genome variation have often been overlooked. Effects of diet do  
59 indeed vary amongst mitochondrial haplotypes, altering metabolism and life-history  
60 (Aw et al., 2018; Bevers et al., 2019; Camus et al., 2020; Drummond et al., 2019;  
61 Mulvey et al., 2017; Nagarajan-Radha et al., 2019; Towarnicki and Ballard, 2018,  
62 2017; Zhu et al., 2014). When both mitochondrial and nuclear genomes vary, we  
63 expect “mito-nuclear” variation, in which effects of variants in one can be either

64 buffered or augmented by variants in the other. In animals, this has been observed  
65 for fecundity (Mossman et al., 2016a), fertility (Camus et al., 2015), lifespan (Camus  
66 et al., 2015; Vaught et al., 2020), gene expression (Camus et al., 2015; Mossman et  
67 al., 2019, 2016b), and epigenomic modifications (Grunau et al., 2018). Novel mito-  
68 nuclear pairings can even change the course of nuclear genomic evolution (Healy  
69 and Burton, 2020), and lead to reproductive isolation (Hill, 2019; Ma et al., 2016).  
70 The intimacy of mito-nuclear coupling leads us to expect coadaptation (Dowling et  
71 al., 2008), and consequently to predict that pairs from the same population  
72 (sympatric) should function optimally. Some studies have supported this prediction  
73 (Baris et al., 2017; Chang et al., 2016; Ellison and Burton, 2006; Ma et al., 2016;  
74 Meiklejohn et al., 2013), but others have not (Dowling et al., 2010; Mossman et al.,  
75 2016b; Vaught et al., 2020). Despite genetic variation in responses to dietary  
76 variation, and the emerging importance of mito-nuclear interactions in overall genetic  
77 variation, there has been relatively little work to connect the three, by asking whether  
78 the phenotypic impacts of dietary alterations are subject to mito-nuclear interactions.  
79 Trailblazing work in *Drosophila melanogaster* has shown diet-mito-nuclear (DMN)  
80 variation in development time, lifespan and fecundity (Camus et al., 2020; Montooth  
81 et al., 2019; Mossman et al., 2016a; Rand et al., 2018; Zhu et al., 2014), but specific  
82 causal nutrients and cellular mechanisms remain to be established.

83

84 Perhaps diet's most immediate fitness effect is regulation of reproduction. Parents  
85 can gain fitness by increasing offspring quantity, or by promoting offspring quality  
86 (Lack, 1947; Smith et al., 1989; Stearns, 1992). Offspring quality and quantity will  
87 depend on fertility, fecundity, and development (viability) of those offspring, each of

88 which are influenced by diet. Equivalent changes in these traits can be elicited in  
89 distinct taxa by equivalent dietary changes: for example, in numerous studies of  
90 insects and mammals, amino acid nutrition has proven consistently important for  
91 fertility, fecundity and offspring development (Bong et al., 2014; Crean and Senior,  
92 2019; Dong et al., 2016; Fanson et al., 2012; Grandison et al., 2009; Jensen et al.,  
93 2015; Lee et al., 2008; Leitão-Gonçalves et al., 2017; Liang and Zhang, 2006; Ma et  
94 al., 2020; Maklakov et al., 2008; McCracken et al., 2020; Mirth et al., 2018; Skorupa  
95 et al., 2008; Solon-Biet et al., 2015; Svajgr et al., 1972; Tufarelli et al., 2015; Winship  
96 et al., 2018; Wong et al., 2014a; Zanco et al., 2020); whereas high-lipid or high-sugar  
97 diets are obesogenic (Dobson et al., 2019; Hariri and Thibault, 2010; Jang et al.,  
98 2018; Rivera et al., 2015; Saud et al., 2015; Wong et al., 2014b; Woodcock et al.,  
99 2015; Zhao et al., 2020). However, importantly, reproduction is not only regulated by  
100 the individual's current diet: large nutritional fluctuations can induce enduring  
101 physiological and molecular changes, which can transmit across generations,  
102 influencing quality of offspring and even grand-offspring (Barker and Osmond, 1986;  
103 Barker and Thornburg, 2013; Deas et al., 2019; Duque-Guimarães and Ozanne,  
104 2017; Holland et al., 2016; Li et al., 2018; Liang and Zhang, 2006; Öst et al., 2014;  
105 Rivera et al., 2015; Stefana et al., 2017; Wei et al., 2014; Winship et al., 2018). Thus,  
106 diet can influence reproduction via lasting, programmed effects on offspring quality,  
107 which point to epigenetic reprogramming, whilst acute effects of diet on both  
108 offspring quality and quantity point to metabolic changes. But do these effects vary  
109 amongst genotypes? If so, is variation shaped by mitochondrial genomes, nuclear  
110 genomes, or by mito-nuclear genotype?

111

112 Understanding health impacts of mito-nuclear interactions is not just a current topic  
113 in biology. It is also pertinent biomedically, because dietary intervention is a  
114 preeminent treatment for human mitochondrial disease (Gorman et al., 2016), and  
115 also following the advent of mitochondrial replacement therapies (Craven et al.,  
116 2010; Tachibana et al., 2018; Wolf et al., 2015). These procedures have been  
117 licensed in the United Kingdom and a few other countries (Cohen et al., 2020). They  
118 aim to treat mitochondrial diseases by placing embryonic nuclei into the cytoplasm,  
119 and therefore mitochondrial context, of a disease-free donor. Some argue that the  
120 conservation of mitochondrial function and the body of evidence for mito-nuclear  
121 interactions suggest that undesired consequences may ensue if the donor  
122 mitochondria function poorly with the nuclear genome (Dobler et al., 2018; Dunham-  
123 Snary and Ballinger, 2015; Reinhardt et al., 2013); although the UK Human Fertility  
124 and Embryology Authority concluded that risks remain “purely theoretical” (HFEA,  
125 2016). To solve this debate it will be important to identify which traits to evaluate in  
126 patients, whether costs or benefits may be diet-dependent, and whether  
127 transgenerational variation may ensue.

128

129 Here, we identify specific nutrients sufficient to drive diet-mito-nuclear variation in  
130 *Drosophila* life-history, and show that specific mito-nuclear genotypes can exhibit  
131 long-lasting, transgenerational responses to transient dietary changes. We bred a  
132 panel of flies with replicated and fully-factorial mito-nuclear variation, and show that  
133 essential amino acids and lipids can elicit novel patterns of variation in fecundity and  
134 offspring performance (development time). We then show for the first time that the  
135 capacity for effects of parental diet on offspring performance are genetically variable,

136 and mito-nuclear in this case. To elucidate overall variation in fitness, we integrate  
137 our analyses of offspring quality and quantity, showing mito-nuclear variation in how  
138 diet influences reproductive investment; and also that “mis-matched” pairs of  
139 mitochondrial and nuclear genomes do not necessarily perform worse than matched  
140 pairs. Finally, we evaluate performance of alternative models of our extensive  
141 datasets, in which interactions between diet, mitochondrial and nuclear haplotype  
142 were systematically included or excluded. We find that models which include mito-  
143 nuclear or diet-mito-nuclear interactions are favoured overwhelmingly over models  
144 which assume no interaction, suggesting that models which do not account for these  
145 terms are not adequate to explain variance in fitness and health.

146

147

148  
149  
150  
151  
152  
153  
154  
155  
156  
157  
158  
159  
160  
161  
162  
163  
164  
165  
166  
167  
168  
169  
170

## Results

We used a set of *D. melanogaster* lines comprising replicated, fully-factorial combinations of varied mitochondrial and nuclear genomes (Figure 1a), derived from heterogeneous populations originally isolated in Australia and Benin (formerly Dahomey). For brevity, we term Australian and Beninese genotypes *A* and *B*, respectively. The populations were introgressed either reciprocally (*AB* = *A* mitochondria / *B* nuclei; *BA* = *B* mitochondria / *A* nuclei), or to themselves to control for introgression and drift (i.e. *AA* = *A* mitochondria / *A* nuclei; *BB* = *B* mitochondria / *B* nuclei). In each generation, a fixed number of females per line were mated to a fixed number of males from the ancestral population. Each combination was replicated in triplicate, generating twelve lines altogether (e.g. *AA1*, *AA2*, *AA3*, *BA1*, *BA2*, etc). The lines were created to retain equivalent standing nuclear variation from the ancestral populations in each of the two mitochondrial backgrounds. Introgressions had been iterated for 74 generations at the time of our first experiment, and so the percentage of nuclear genome that remained unreplaced by introgression in the *AB* and *BA* genotypes was expected to be negligibly small (~5.3e-21%). Ancestors of all lines were cleared of cytoplasmic *Wolbachia* endosymbionts long prior to these experiments (Vaught et al., 2020), and so we expect cytoplasmic genetic complements to comprise only mitochondria. The *A* and *B* nuclear genomes do not appear to select for differential mitochondrial haplotypes in this design (Vaught et al., 2020), and we expect the rigorous backcrossing regime to minimize differential segregation of nuclear genomic variants over *A* and *B*



171 mitochondria: this experimental design should therefore produce fully-factorial mito-

172 nuclear variation.

173

174

**Figure 1**

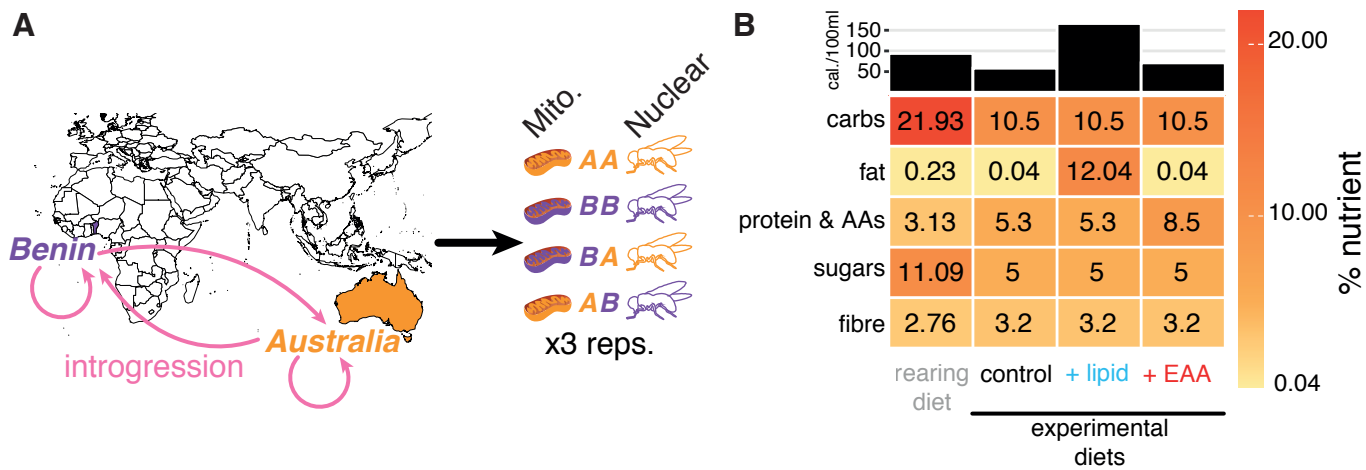

176 **Figure 1. Study design. A.** Genetically distinct and heterogeneous populations of  
177 flies were originally isolated from from Benin (formerly Dahomey), and New South  
178 Wales, Australia. Mito-nuclear variation was generated by reciprocally introgressing  
179 each line either into its own respective cytoplasmic background, or into the other  
180 line's cytoplasmic background. Three biologically independent replicate lines were  
181 established per mito-nuclear combination. 74 iterations of introgression were  
182 completed before experiments. **B.** Fly lines were cultured on rearing diet and then  
183 fed experimental diets in adulthood. The heatmap shows estimated content of  
184 different macronutrients, bars at the top indicating caloric content.  
185

186 **EAA and lipid nutrition are sufficient to drive diet-mito-nuclear variation in life-**  
187 **history**

188

189 To identify nutrients which could drive DMN interactions, we added nutrients to a  
190 sugar-yeast diet (Bass et al., 2007), as previously (Dobson et al., 2018; Emran et al.,  
191 2014; Grandison et al., 2009). To ensure that potential novelty effects were evenly  
192 distributed amongst conditions, the baseline diet was distinct from the medium on  
193 which the lines were maintained and developed. For experimental diets, we added  
194 one of two nutrients to the baseline, selected for their important and conserved  
195 health impacts. Essential amino acids (EAAs) are metabolised by mitochondria  
196 (Mariño et al., 2014), and their specific enrichment is sufficient to recapitulate  
197 fecundity effects of adding yeast (Emran et al., 2014; Grandison et al., 2009). We  
198 also manipulated dietary lipid, because mitochondria metabolise fatty acids, and  
199 high-fat animal diets can model Western human disease (Hariri and Thibault, 2010;  
200 Heymsfield and Wadden, 2017). Lipid source can have large physiological effects  
201 (Brankatschk et al., 2018), and flies are largely vegan in nature (Knittelfelder et al.,  
202 2020). Therefore, we supplied a plant-based lipid which set in agar (i.e. in contrast to  
203 oils), by adding margarine to the diet (15% w/v, after (Woodcock et al., 2015)). Whilst  
204 this design did not control calories, it enabled us to test whether specific,  
205 ecologically-relevant nutrients can cause diet-mito-nuclear variation. Estimated  
206 nutrient contents (Lesperance and Broderick, 2020) are presented in Figure 1b.

207

208 Previous work showed that manipulating complex nutrient sources elicits life-history  
209 variation in specific mito-nuclear genotypes, including in fecundity (egg laying), and

210 offspring development (Camus et al., 2020; Montooth et al., 2019; Mossman et al.,  
211 2016a; Rand et al., 2018; Zhu et al., 2014). We tested whether EAAs and lipid were  
212 sufficient to cause these effects. Starting three days after adult emergence, the  
213 control, EAA-enriched and lipid-enriched foods were fed to flies of all lines for seven  
214 days. We restricted treatment to adults, to avoid developmental variation (Figure 2a).  
215 This experiment was repeated twice. In both experiments, EAAs increased fecundity,  
216 and lipids repressed fecundity. Fecundity was correlated between the two  
217 experiments, indicating technical repeatability (Figure 2b). Biologically, two important  
218 trends were evident. First, genetic replicates consistently grouped together, with all  
219 three replicates of each mito-nuclear genotype tending to sit within one standard  
220 deviation of each other (Figure S1), despite having been separated for >70  
221 generations of introgression. This suggested a highly stereotyped effect of mito-  
222 nuclear genotype on fecundity, which overcame any genetic drift in the fly lines.  
223 Therefore, for simplification, we replotted the data without distinguishing  
224 experimental or genetic replicates (Figure 2c). This outlined the second important  
225 trend, that mito-nuclear variation was shaped by diet, in agreement with a GLMM  
226 analysis indicating a three-way interaction ( $p=0.009$ , Table S1). To visualise pairwise  
227 statistical differences between every genotype, we used *post-hoc* estimated marginal  
228 means (EMMs (Searle et al., 1980)) analysis. These EMMs represented the GLMM  
229 output per experimental condition, and so their correlation to the raw data indicated a  
230 good model fit (Figure 2c). Pairwise comparison of EMMs was consistent with our  
231 interpretation that overall patterns of among-genotype variation in fecundity were  
232 diet-dependent (Table S2). These results revealed distinct patterns of mito-nuclear  
233 variation on different diets, and that impacts of consuming a certain diet depend on

234 mito-nuclear genotype.

235

236 Animal fitness is a function of both quantity and quality of offspring, and DMN  
237 variation in offspring development has already been documented. Having shown that  
238 EAAs and lipid were sufficient to cause DMN variation in egg laying, we  
239 hypothesised that variation in offspring quality may additionally manifest in fertility of  
240 those eggs. To test this, after parents had been fed experimental diets for a week as  
241 previously, we allowed eggs laid over 24h to develop in the same experimental  
242 media. We scored time to adult and pupal emergence, along with sex in adults. We  
243 take proportion of eggs emerging as a metric of parental reproductive success, and  
244 time to development as a metric of relative offspring fitness. In every mito-nuclear  
245 genotype, food enrichment with EAAs or lipid either reduced the proportion  
246 developing, extended development time, or both. However, the magnitude of these  
247 effects was highly genotype-dependent (Figure 2d). For explicit analysis, we fit Cox  
248 mixed-effects (CME) survival models. The DMN interaction was statistically  
249 significant for emergence of both males and females to adulthood (each sex  
250  $p < 0.0005$ , Table S3, Figure S2). We did not detect robust sex-specificity  
251 (Supplementary Text, Figure S2), and results were broadly repeatable within the  
252 triplicates of each fly genotype (Figure S2). To confirm genotype-specific effects, we  
253 applied *post-hoc* EMM tests to the CME model. This analysis aggregated time to  
254 development and proportion developing into a single quantitative output, because  
255 the EMMs were a posterior view of our CME analysis, which integrates time to  
256 development and proportion developing. In this framework, high EMMs correspond  
257 to faster and/or more frequent development, and vice-versa (Figure 2e). These

258 EMMs confirmed that EAA or lipid enrichment disadvantaged specific genotypes  
259 (Figure 2e). The *AA* flies bore a particular cost of reduced survival on EAA food. The  
260 differential ranking of EMMs across genotypes on different diets indicated that the  
261 pattern of mito-nuclear genetic variation was dependent on EAA and lipid nutrition.  
262 Indeed, as with fecundity, there was little variation within each triplicate per mito-  
263 nuclear genotype (except that the detrimental effect of EAAs on development of *AA*  
264 flies was pushed to lethality in the *AA3* line, and *BB3* was somewhat more lipid-  
265 resistant than *BB1* and *BB2* (Figure S2)), suggesting that the developmental  
266 response to nutrition is highly stereotyped by mito-nuclear genotype. A parallel  
267 analysis of these same individuals' time to pupation revealed congruent patterns  
268 (Figure S3, Figure S4, Table S4). Altogether, these results show that either lipid or  
269 EAA enrichment are sufficient to potently modify developmental outputs of mito-  
270 nuclear genetic variation.  
271

**Figure 2**

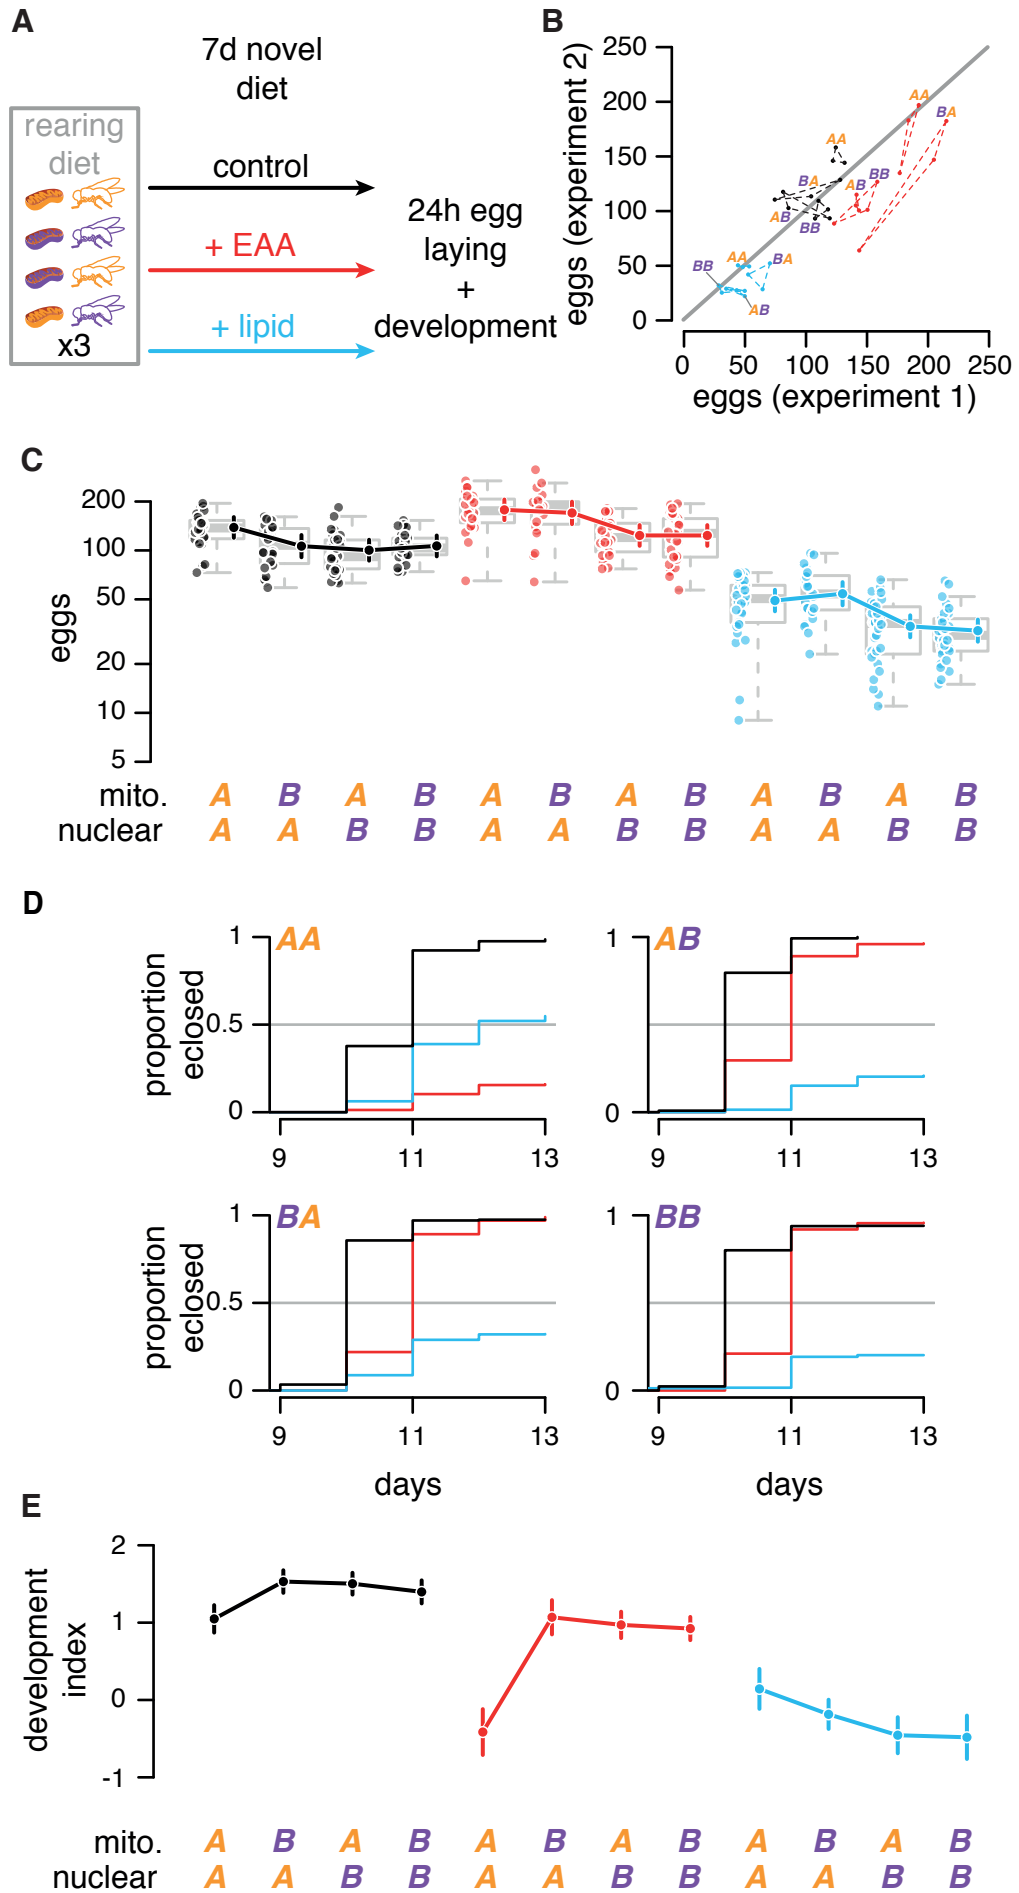



274 **Figure 2. Diet-mito-nuclear interactions modulate *Drosophila* fecundity. A.**

275 Experimental design. The 12 mito-nuclear lines were reared from egg to adult on  
276 rearing food, and allocated at random to experimental media 6-48h after eclosion, at  
277 a density of five of each sex per vial. After seven days, flies laid eggs on fresh food  
278 for 24 hours. **B.** Intra-line correlations in impact of diet-mito-nuclear variation on egg  
279 laying. Each point shows mean egg laying per line per diet in each of two replicate  
280 experiments, with the replicates of each haplotype grouped by dashed lines. Means  
281 were correlated between experiments (Pearson's  $r = 0.87$ ,  $p = 7.6e-12$ ). **C.** Impact of  
282 diet on fecundity is determined by mito-nuclear variation. Data are pooled across the  
283 experimental and genetic replicates presented in panel B. Boxplots show medians,  
284 first and third quartiles and 5th and 95th percentiles. Connected points to right of  
285 each box show *post-hoc* comparisons of means (by estimated marginal means with  
286 95% confidence intervals, calculated from a generalised linear mixed effects model,  
287 showing exponent of EMMs in order to fit to original data scale). Translucent points  
288 to left of each box show raw data. Complementary statistical analysis presented in  
289 Table S1 and Table S2. **D.** Kaplan-Meier plots of development (egg-to-adult) after  
290 parents fed and offspring developed on experimental media. Mito-nuclear genotypes  
291 are indicated in top-left of each panel. **E.** Estimated marginal means (EMMs) with  
292 95% confidence intervals summarising survival analysis (Cox mixed effects) of data  
293 from D. Higher values correspond to faster development and/or increased fertility,  
294 lower values correspond to slower development and/or reduced viability.  
295 Accompanying statistical analysis presented in Table S3.

296

297 **Persistent life-history effects of dietary EAAs and lipid in specific mito-nuclear**  
298 **genotypes**

299

300 DMN interactions could occur via numerous mechanisms, but no candidate has yet  
301 been confirmed. Dietary variation induces not only immediate changes to  
302 metabolism, but also long-lasting epigenetic changes (Barker and Osmond, 1986;  
303 Barker and Thornburg, 2013; Deas et al., 2019; Dobson et al., 2017; Duque-  
304 Guimarães and Ozanne, 2017; Holland et al., 2016; Li et al., 2018; Liang and Zhang,  
305 2006; Öst et al., 2014; Rivera et al., 2015; Stefana et al., 2017; Wei et al., 2014;  
306 Winship et al., 2018). Mitochondria metabolise substrates for epigenetic  
307 modifications (Eisenberg et al., 2014; Mariño et al., 2014; Trefely et al., 2020),  
308 suggesting that nutritional regulation of epigenetically-encoded traits may vary  
309 amongst mito-nuclear genotypes. We asked whether EAAs and lipid might drive  
310 DMN interactions for life-history via long-term reprogramming. Whilst such effects  
311 are consistent with epigenetic modifications, we conservatively avoid that term for  
312 our data because we did not measure epigenetic marks directly. We tested for long-  
313 lasting effects of transient EAA and lipid enrichment, both in the generation that  
314 experienced the nutritional manipulation, and in their offspring.

315

316 We conducted a second fecundity experiment, with a week of adult-onset feeding on  
317 experimental diets as previously, but followed by a diet switch back to standardised  
318 rearing medium. Fecundity was measured at the end of experimental diet feeding,  
319 and 24h after switching back to standardised medium, yielding vial-matched egg  
320 counts pre- and post- switch (Figure 3a). The overall effect of experimental diets was

321 equivalent before and after the switch (EAAs elevated fecundity, lipid repressed  
322 fecundity), confirming that effects of experimental diets persisted for the 24h feeding  
323 on standardised diet (Figure 3b). Before the switch, on experimental diets, a DMN  
324 interaction was once again evident (Figure 3c, Table S5, Figure S5a), and pooling  
325 these data with preceding data (Figure 2) yielded the same qualitative result (Figure  
326 S6, Table S6), confirming that DMN effects were consistent across experiments.

327

328 A GLMM analysis confirmed that, after switching back to standardised diet, the main  
329 effects of prior EAA or lipid feeding persisted (Figure 3d, Table S7, Figure S5b).

330 However, the DMN interaction did not persist (Figure 3d, Table S7, Figure S5b).

331 These findings suggested that EAA and lipid modify the manifestation of mito-  
332 nuclear variation in fecundity via transient effects; on top of longer-term impacts  
333 which do not depend on mito-nuclear genotype. If so, recovery of fecundity after diet  
334 switch should exhibit a DMN interaction. We estimated recovery rate as the ratio of  
335 eggs laid per vial after/before the switch, with greater ratios indicating greater  
336 plasticity. Recovery from EAA or lipid feeding was indeed variable amongst mito-  
337 nuclear genotypes (Figure 3e; GLMM  $p=2.91E-09$ , Table S8; Figure S5c).

338 Altogether, these analyses revealed two layers of variation, with genotype-  
339 independent main effects of dietary EAAs and lipid which persist after feeding, and  
340 additional DMN variation whilst feeding on the diets, but not after. This suggested  
341 that EAAs and lipid can have lasting fecundity effects which generalise amongst  
342 mito-nuclear genotypes, but did not exclude the possibility of longer-term,  
343 transgenerational diet-mito-nuclear impacts on offspring.

344

345 Diet can modulate fitness by effects that span one or more generations (Camilleri-  
346 Carter et al., 2019; Deas et al., 2019; Öst et al., 2014; Rivera et al., 2015). We are  
347 not aware of a prior demonstration of genetic variation in such transgenerational  
348 reprogramming, nor of whether it is subject specifically to mito-nuclear variation.  
349 Since we had already observed that feeding EAAs and lipid to both parents and  
350 offspring modified the manifestation of mito-nuclear genetic variation in development,  
351 we speculated that some of that variation could be due to differential legacies of  
352 parental diet. If so, we expected that feeding EAAs or lipid to parents alone would be  
353 sufficient to modify patterns of mito-nuclear variation in offspring development, even  
354 when all offspring developed in a standardized medium.

355

356 We restricted diet manipulations to adults for one week, before egg-laying on  
357 standardised developmental medium, and allowing those eggs to develop on that  
358 standardised medium. This design differs from the preceding study of developmental  
359 effects (Figure 2d-e), because diet was only manipulated in the parental generation.  
360 Therefore any diet-mito-nuclear effect (or lower-order diet effect) detected in this  
361 experiment is transgenerational. We scored time to adult emergence (along with sex  
362 and pupation), and again, results were consistent within each triplicate fly genotype  
363 (Figure S2), and so data were plotted after pooling all three replicates per genotype.  
364 Plotting these data suggested that, indeed, parental nutrition had genotype-specific  
365 effects on development (Figure 3f). This was confirmed by CME analysis (Table S9,  
366 males  $p=0.003$ , female  $p=0.03$ ), without strong evidence of sex bias (Supplementary  
367 Text, Figure S2). EMM analysis confirmed genotype-specific impacts (Figure 3g):  
368 Specifically, AA flies developed on average a full day faster when parents were fed

369 lipid-enriched food (Figure 3f). A parallel analysis of these same individuals' time to  
370 pupation revealed congruent patterns (Figure S3, Figure S4, Table S10). Whilst  
371 some variation may be due to selection, our experimental design largely excludes  
372 this possibility, because the only nutritional variation that individuals under study  
373 experienced was *in utero* when mothers fed on experimental diets, before post-  
374 embryonic development in standardised medium; and variation in rearing density  
375 was also accounted for statistically. Furthermore, since the major effect we observe  
376 is an acceleration of development in one condition (AA flies fed lipid), selection  
377 would have to be otherwise ubiquitous but relaxed specifically for this condition. The  
378 results therefore indicate that specific mito-nuclear genotypes are susceptible to  
379 transgenerational effects of parental nutrition, in this case lipid.

380

381 Notably, the transgenerational effects we observed in development did not correlate  
382 patterns when both parents and offspring were fed the diets. Our studies of  
383 transgenerational and intergenerational effects of EAAs and lipid were conducted at  
384 the same time (Figure 2d-e flies developed from eggs plotted in Figure 3c, Figure 3f-  
385 g from eggs in Figure 3d), validating this comparison. Altogether, this discord  
386 suggests that nutrients can induce transgenerational effects in specific mito-nuclear  
387 genotypes, but this reprogramming in combination with ongoing nutrient enrichment  
388 in offspring leads to additional changes to patterns of phenotypic variation.

389

**Figure 6**

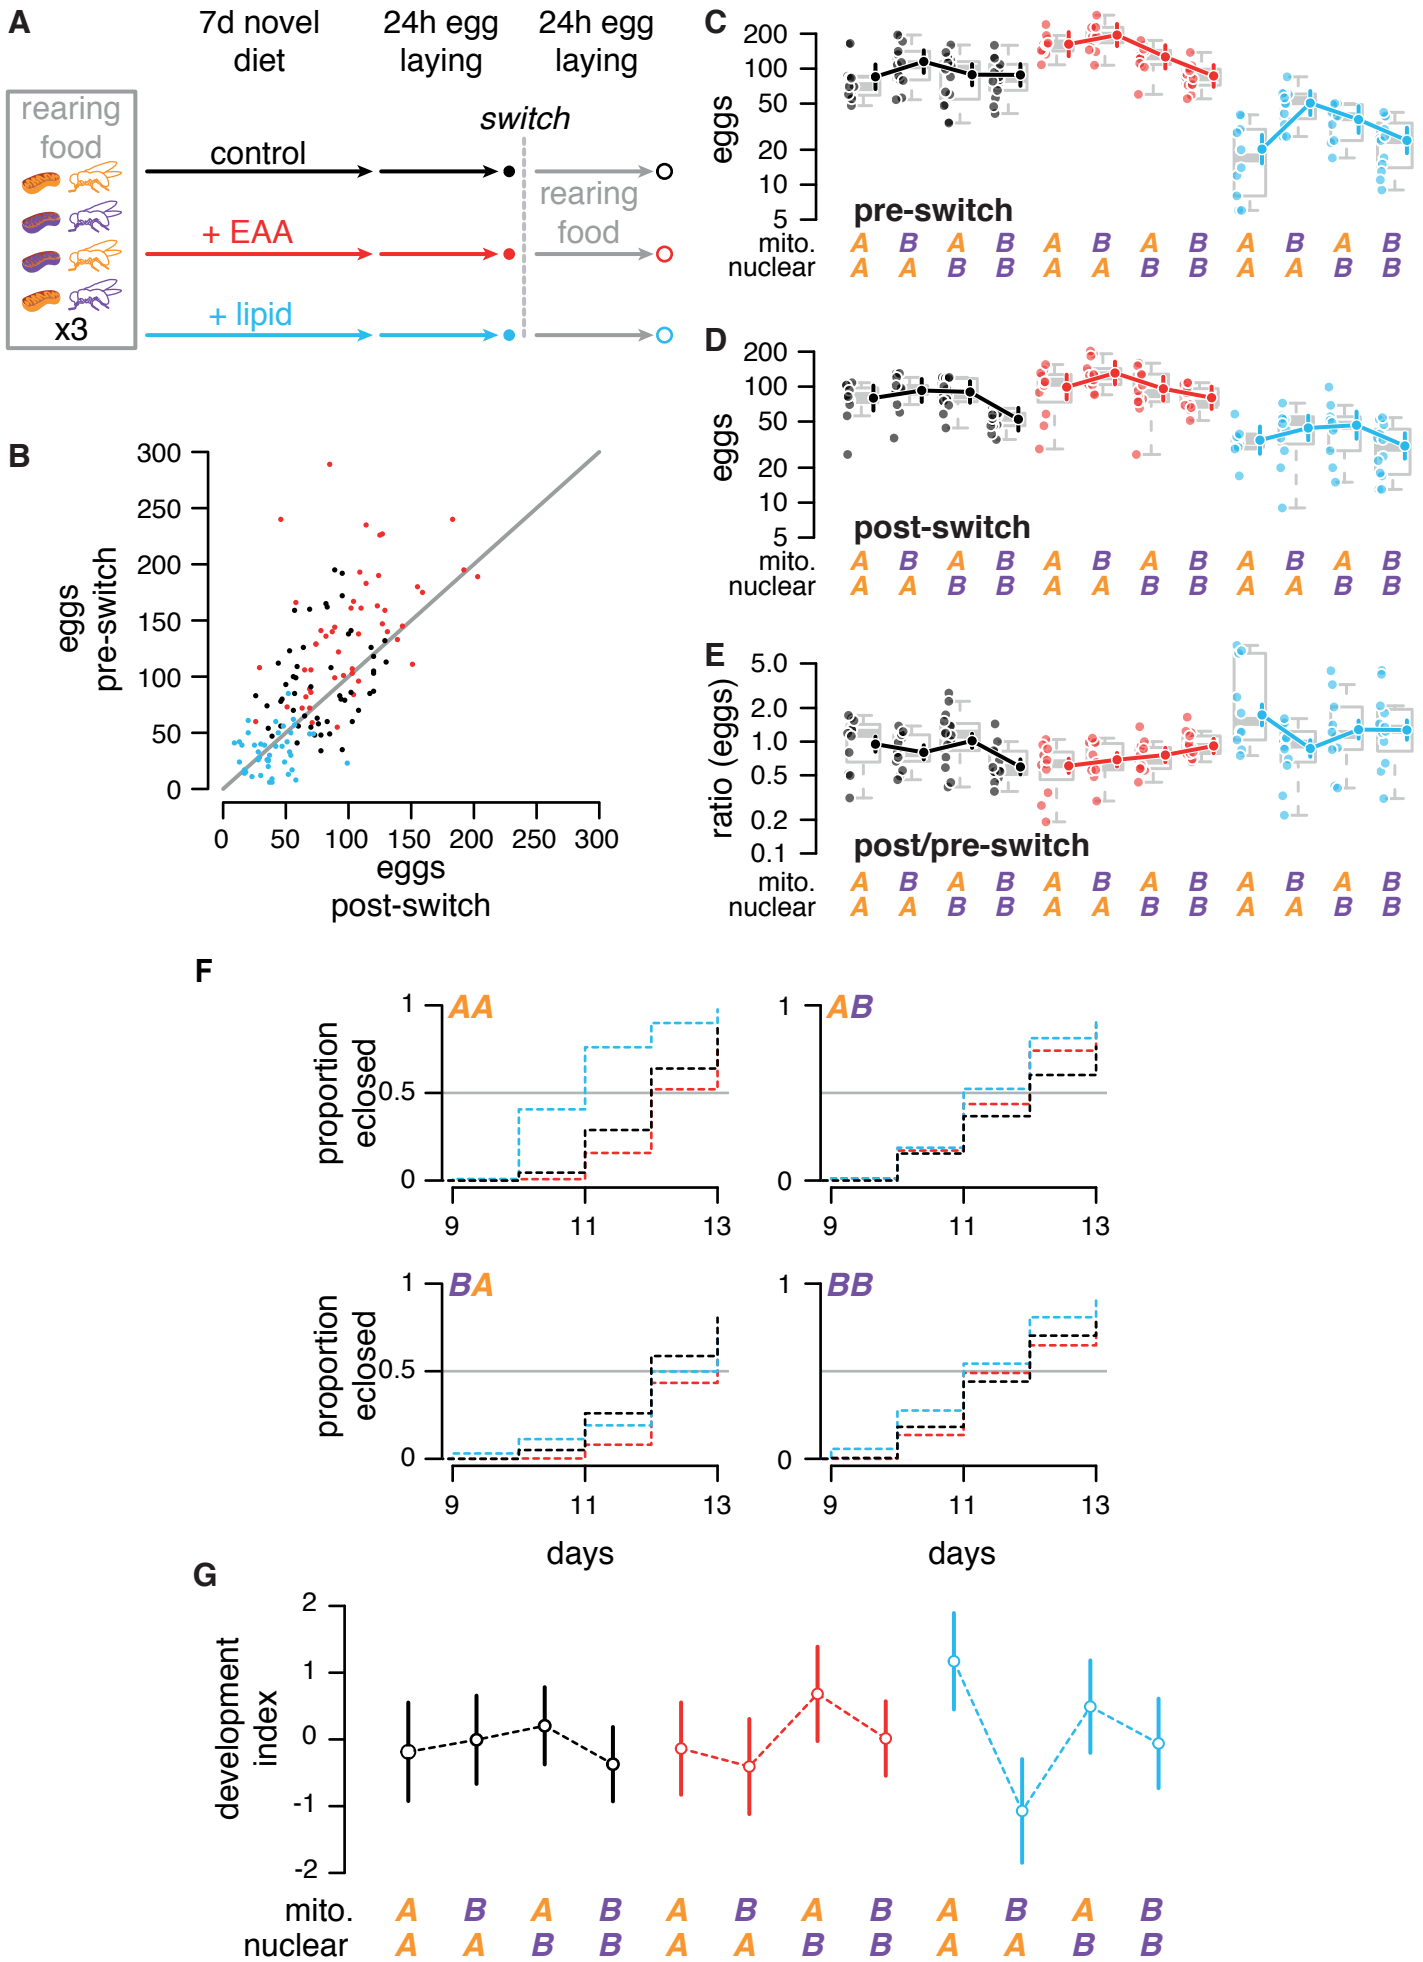

391 **Figure 3. Performance is determined by interplay of mito-nuclear genotype and**  
392 **persistent intragenerational and transgenerational effects of diet. A.**

393 Experimental design. 12 Mito-nuclear lines were reared from egg to adult on rearing  
394 food, and allocated at random to experimental media 6-48h after eclosion, at a  
395 density of five of each sex per vial. After seven days, flies laid eggs on fresh food for  
396 24 hours. Females were then reassigned back to standardised rearing medium, and  
397 eggs were laid for a further 24h. **B.** Correspondence between egg laying rate per  
398 vial, before and after switch from experimental diets. Egg laying rates before and  
399 after switch across all diets were correlated (Pearson's product-moment correlation,  
400  $r=0.65$ ,  $p<2.2e-16$ ). Line of equivalence shown in grey. **C.** Egg laying rate before  
401 dietary switch is determined by mito-nuclear variation (*vis* Fig 2C). Boxplots show  
402 medians, first and third quartiles and 5th and 95th percentiles. Connected points to  
403 right of boxes show *post-hoc* comparisons of means (by estimated marginal means  
404 with 95% confidence intervals, calculated from a generalised linear mixed effects  
405 model). Translucent points to left of each box show raw data. Complementary  
406 statistical analysis presented in Table S5. **D.** Diet-mito-nuclear interactions do not  
407 persist 24h after switch from experimental media. Statistical analysis presented in  
408 Table S7. **E.** Mito-nuclear interactions govern recovery of fecundity after switch from  
409 experimental media. Statistical analysis presented in Table S8. **F.** Kaplan-Meier plots  
410 of development to adulthood of eggs laid on developmental media, after parents had  
411 previously fed on experimental media. Mito-nuclear genotypes are indicated in top-  
412 left of each panel. **G.** Estimated marginal means (EMMs) with 95% confidence  
413 intervals summarising survival analysis (Cox mixed effects) of data from F. Higher  
414 values correspond to faster development and/or increased fertility, lower values

415 correspond to slower development and/or reduced viability. Accompanying statistical

416 analysis presented in Table S9.

417



418

419 **Mito-nuclear (mis-)matching does not predict differential life-history responses**  
420 **to nutrition**

421

422 Together, offspring quantity and quality define fitness (Lack, 1947; Stearns, 1992).

423 Our analyses suggested that both fecundity (quantity) and fertility (quality) are

424 regulated by EAAs and lipid, but specific mito-nuclear genotypes are differentially

425 receptive or resistant to these effects. To date, the widely-held prediction of a

426 disadvantage to “mis-matched” mito-nuclear pairings, has received equivocal

427 support (Baris et al., 2017; Chang et al., 2016; Ellison and Burton, 2006; Ma et al.,

428 2016; Meiklejohn et al., 2013). Our datasets provided an opportunity to ask whether

429 this prediction applied in terms of differential responses to specific nutrients; whilst

430 taking an integrative view of fitness, encompassing both offspring quality and

431 quantity, and putatively epigenetic effects. To this end, we integrated outputs of our

432 previous analyses by plotted EMMs from against one another, indicating effects of

433 diet and mito-nuclear genotype on offspring quality and quantity, and the relationship

434 between them. We did this separately for data from parents and offspring both fed

435 experimental diets (flies in Figure 2e, which developed from eggs in Figure 3c), and

436 from parent-restricted feeding (flies in Figure 3g, which developed from eggs in

437 Figure 3d).

438

439 First, we examined impacts of EAA feeding. Visual inspection indicated that EAA

440 enrichment enhanced offspring quantity, but compromised offspring quality in flies of

441 all genotypes except *BB* (Figure 4a). This was surprising, because we had assumed

442 that parents should discriminate diets that maximise their own fitness, and therefore  
443 that parental egg-laying would correlate offspring development indices. Instead, the  
444 apparent tradeoff indicates either that (1) EAAs signal diet quality to parents on  
445 normal diets when yeast is the source of most nutrients (including protein), but our  
446 manipulations rendered this quality signal misleading (Zanco et al., 2020); or that (2)  
447 diet is subject to parent-offspring conflict (Trivers, 1974), with parents maximising  
448 their fitness by producing more eggs on high EAA-diets, despite the cost to individual  
449 offspring.

450

451 Were costs of EAAs genotype-specific? The quality-quantity tradeoff induced by EAA  
452 feeding was exaggerated dramatically in *AA* flies, whose eggs developed  
453 exceptionally poorly on EAA-enriched food. However, this cost of EAAs was rescued  
454 in both *BA* and *AB* genotypes, indicating that neither *A* mitochondria nor *A* nuclei  
455 alone were sufficient for *AA*'s diet-dependent phenotype, and therefore that these  
456 effects are mito-nuclear (Figure 4a). This outlined a second surprising finding, in  
457 which a sympatric mito-nuclear pairing endured a higher cost of dietary EAAs than  
458 allopatric pairings (Figure 4a). Thus, unexpected, costly, and definitively mito-nuclear  
459 patterns of variation can emerge on specific diets. However, no clear effects of past  
460 EAA feeding on offspring quality or quantity were evident (Figure 4b). Together,  
461 these results indicated that EAAs interact with mito-nuclear genotype during feeding,  
462 but not thereafter. This suggests that the reproductive DMN variation we observed  
463 upon EAA enrichment is an acute effect of diet, and therefore likely metabolic and  
464 not epigenetic.

465

466 Next we examined the impact of lipid enrichment. Lipid mostly compromised both  
467 quality and quantity, but one genotype stood out: *AA* flies were most resistant to the  
468 reduction in offspring quality induced by high-lipid diet, and their development index  
469 on lipid-enriched food was in fact better than on EAA-enriched food (Figure 4a). By  
470 this metric, *AA* flies' performance was substantially better than the *AB* or *BA* flies,  
471 confirming that neither *A* mitochondria nor *A* nuclei alone were sufficient to explain  
472 *AA*'s response to diet. This again suggested that genotypes which exhibit notable  
473 responses to diet do not necessarily bear allopatric combinations of mitochondria  
474 and nuclear genomes. Furthermore, the finding that the *AA* genotype was beneficial  
475 in one condition (EAA) despite costs in another (lipid) reveals that it was not simply  
476 sick as would be expected with a poor-functioning mito-nuclear pairing, but instead  
477 exhibits its own genotype-specific pattern of response to diet.

478

479 Finally, we evaluated the impact on offspring of parent-restricted lipid enrichment. All  
480 genotypes bore costs, but impacts were highly genotype-specific. Again, the *AA* flies  
481 stood out. Specifically, *AA* flies bore a cost of parental lipid feeding on offspring  
482 quantity, but appeared to enjoy a compensatory benefit from enhanced offspring  
483 quality. In fact, these flies exhibited the highest offspring quality (development index)  
484 observed in any condition in our study. These benefits were not evident in either the  
485 *AB* or *BA* flies, confirming again that neither *A* mitochondria nor *A* nuclei alone are  
486 sufficient to explain diet-dependent phenotype: the observed effects are mito-  
487 nuclear.

488

489 Altogether, these results confirm diet-mito-nuclear shaping of fitness. They show that  
490 diet can induce phenotypic change in specific mito-nuclear genotypes, with neither *A*  
491 mitochondria nor *A* nuclei accounting for the *AA* flies' differential response to diet.  
492 This suggests that mito-nuclear "matching" is not necessarily optimal. In wild  
493 populations, the cost of EAA susceptibility may be balanced by lipid resistance, in  
494 which case these flies were not sick in all circumstances, but rather exhibit a private  
495 pattern of genotype-specific variation, which is evident only on specific diets.  
496

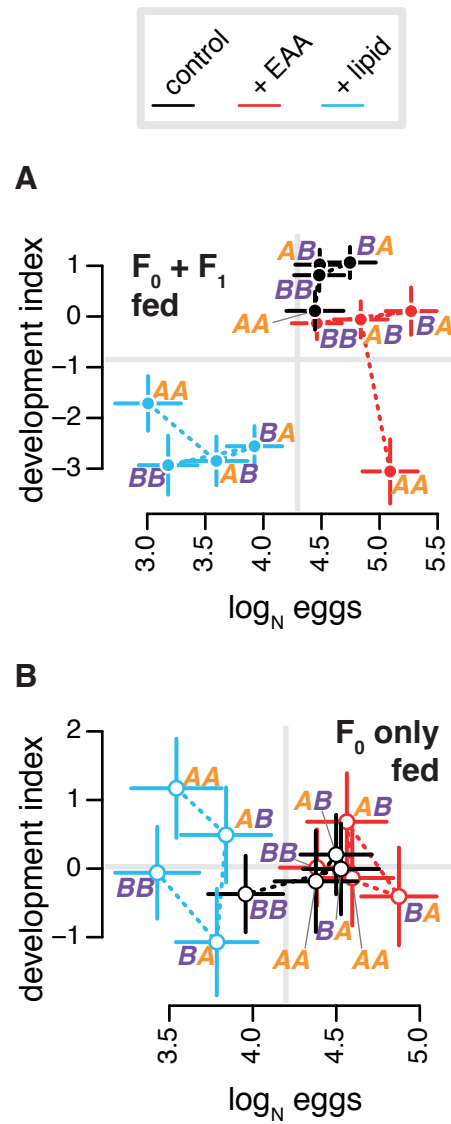

498 **Figure 4. Mito-nuclear interactions dictate dietary modulation of offspring**  
499 **quality versus quantity.** Panels show relationships per diet and per genotype (data  
500 from Figures 2-3). **A** offspring development index and eggs laid, when both parents  
501 and offspring were fed experimental diets, and **B** development index before switch  
502 and release of egg laying after diet, when parents were switched from experimental  
503 to standard diets. Points show EMMs $\pm$ 95% confidence intervals, and grey lines  
504 indicate grand means.  
505

506

507 **Diet-mito-nuclear effects cause substantial biological variation**

508

509 Finally, we sought to test the importance of the DMN interactions that we identified  
510 for overall variation in our dataset, for two reasons. First, because the DMN patterns  
511 that we identified may be of previously-unrecognised importance in nature. Second,  
512 because mitochondrial transfer therapy (Craven et al., 2010; Tachibana et al., 2018;  
513 Wolf et al., 2015) presents the possibility of a medical procedure giving patients  
514 novel combinations of mitochondrial and nuclear genomes, which our results  
515 suggest may lead to unpredictable responses to nutritional variation. Therefore, we  
516 sought effect sizes of DMN terms, complementing our preceding analyses by  
517 outlining whether DMN effects were substantial, or biologically trivial despite  
518 statistical significance.

519

520 Since *de facto* effect sizes for interaction terms are not easily interpreted, we used  
521 optimization procedures to compare simple models of the data against those  
522 including DMN interactions (Akaike, 1974). Calculating Akaike Weights reveals  
523 performance amongst a set of models, in terms of the relative probability of being the  
524 best description of the data (Wagenmakers and Farrell, 2004). We applied this  
525 procedure to all our previously-presented models (Figures 2-3, Figure S5), and  
526 simpler alternatives. Cases where this analysis favoured including DMN interactions  
527 argued for the importance of this novel tier of variation in health, which mitochondrial  
528 transfer will influence in ways that we cannot currently predict.

529

530 Akaike Weights suggested that models accounting for DMN interactions performed  
531 best described all datasets but one, and that purely additive models (assuming no  
532 interactions) were deficient by comparison (Figure 5).

533

534 For fecundity data (Figures 2-3), we fit a structured series of models, systematically  
535 including or eliminating all possible interactions amongst diet, mitochondrial and  
536 nuclear genotype. Akaike Weights favoured including DMN interactions (Figure 5a-  
537 d): for example, a model of data from Figure 2c including DMN interactions was 61.7  
538 times more likely to be the best model than another with no interactions (Figure 5a);  
539 and approximately twice more likely than the next-best, which retained only the  
540 diet:nuclear interaction (Figure 5a). Models including DMN terms were also the best  
541 descriptor of fecundity before switching from experimental media (data from Figure  
542 3c), and the release of fecundity after switching (data from Figure 3e). The exception  
543 to the emergent rule was the case of fecundity after switching from experimental  
544 media (Figure 3d), in which the favoured model included a mito-nuclear term, but not  
545 a DMN term. This exception demonstrated that the most complex models were not  
546 favoured automatically, but therefore encouraging confidence in other cases,  
547 suggesting that DMN interactions do indeed explain substantial variation.

548

549 For development data (Figures 2e, Figure 3f, Figure S4-S6), including terms for  
550 offspring sex added an additional order of complexity (i.e. a potential four-way  
551 interaction), rendering an assessment of all possible combinations hard to interpret.  
552 Therefore, we calculated Akaike Weights for models including either only first-degree  
553 terms (a purely additive model, without interaction terms), second-degree terms (all



554 pairwise combinations), third-degree terms (all three-way interactions), or fourth-  
555 degree terms (all four-way interactions, but only when sex was known, in models of  
556 adult emergence). We did this both for development to pupa (Figure 5e-f) and to  
557 adult (Figure 5g-h), and when diet was manipulated either for both parents and  
558 offspring (Figures 5e and 5g), or solely for parents (Figures 5f and 5h). In each case,  
559 models including all possible interaction terms performed best, often by several  
560 orders of magnitude (note logarithmic scale on figures). This analysis indicated that  
561 DMN interactions exert a substantial influence on developmental variation.

562

563 In summary, our modelling indicates that key health and fitness metrics - fecundity  
564 and development - are subject to significant interactions amongst mito-nuclear  
565 genotype and diet, and that those interactions account for significant variation in our  
566 data, which reflects the real-world mosaic of diet-mito-nuclear variation.

567

**Figure 5**

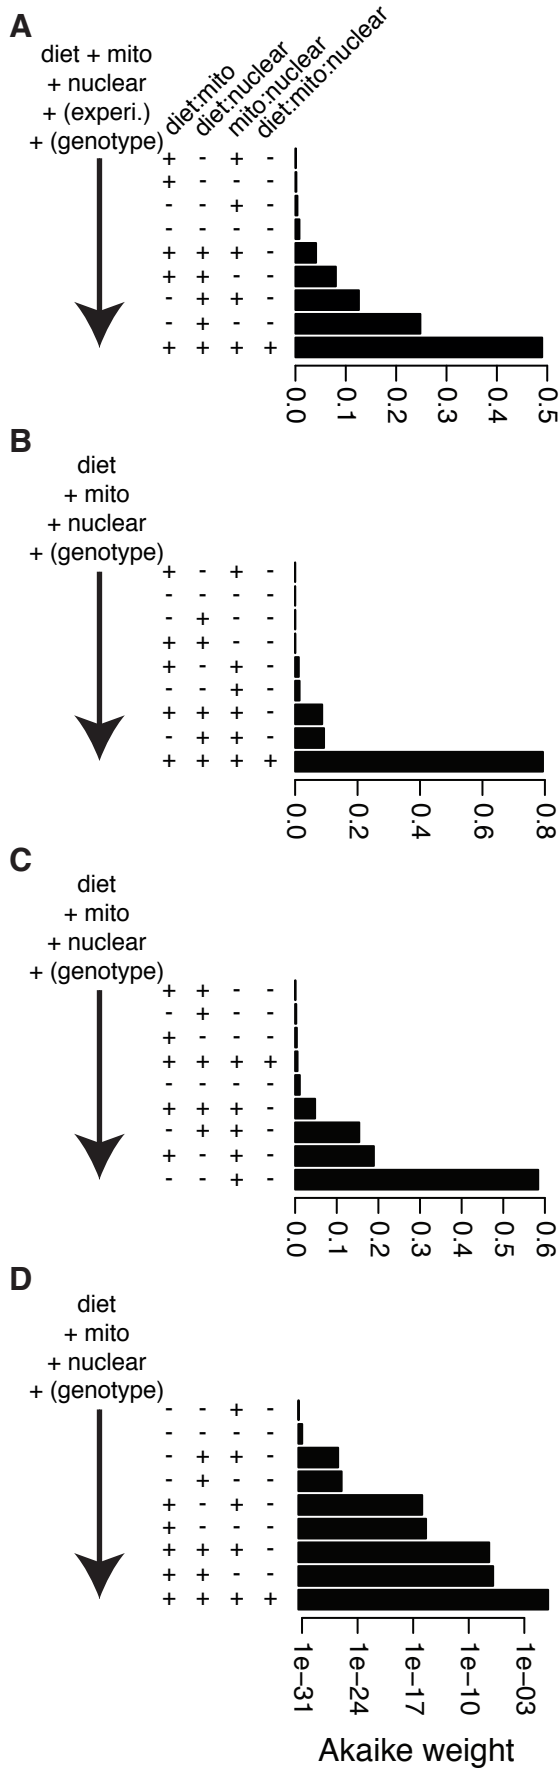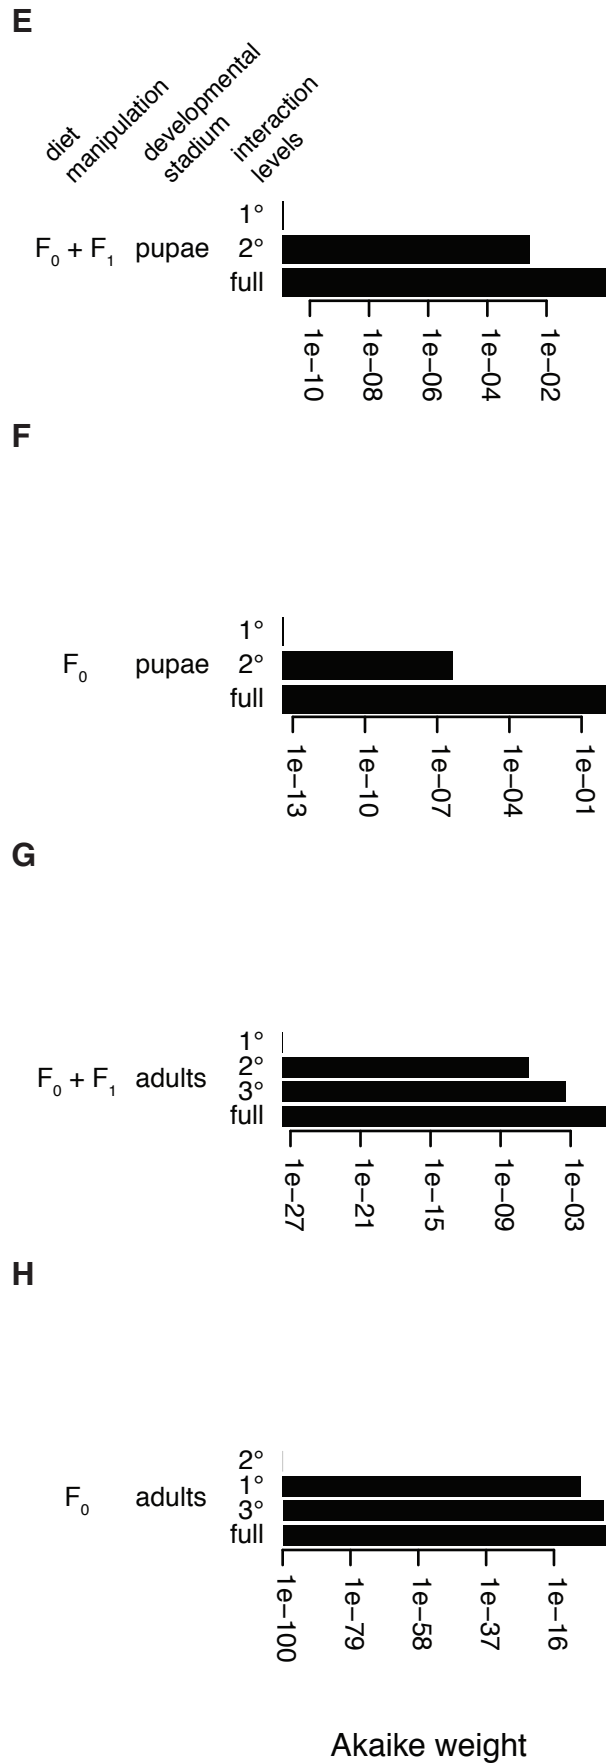

569 **Figure 5. Models including interactions amongst mitochondrial and nuclear**  
570 **genotypes and diet treatment are favoured over alternatives.** Barplots indicate  
571 Akaike weights analyses of sets of alternative models of data from Figures 2-3.  
572 Columns to left of each panel indicate terms in each model. Higher values indicate a  
573 better-supported model. The probability that one describes data better than another  
574 can be calculated by the ratio of their respective Akaike Weights. Plots compare  
575 models of data of fecundity of varied mito-nuclear genotypes fed experimental diets  
576 (**A**, data from Figure 2; and **B**, data from Figure 3c), after feeding on experimental  
577 diets (**C**, data from Figure 3d), and the ratio of fecundity before and after switching  
578 from experimental to standardised diets (**D**, data from Figure 3e). Plots E-H compare  
579 models of development time and rate, when models included either no interactions  
580 between predictive terms, or various levels of interactions as indicated, for  
581 development to pupa when experimental diets were fed to either parents and  
582 offspring (**E**, data from Figure S3) or parents alone (**F**, data from Figure S3), and  
583 development to adult when experimental diets were fed to either parents and  
584 offspring (**G**, data from Figure 2) or parents alone (**H**, data from Figure 3).  
585

586

587

## Discussion

588

589 Diet is a major source of biological variation. Evidence is now mounting that mito-  
590 nuclear interactions are also a substantial source of variation, with implications in  
591 areas as diverse as mitochondrial disease, ageing, evolution of sex, and speciation  
592 (Ballard and Melvin, 2010; Đorđević et al., 2017; Gemmell et al., 2004; Gershoni et  
593 al., 2009; Havird et al., 2015; Hill, 2017; Innocenti et al., 2011; Latorre-Pellicer et al.,  
594 2019; Milot et al., 2017; Reinhardt et al., 2013; Wallace and Chalkia, 2013). Our  
595 work complements previous studies showing that diet and mito-nuclear variation  
596 interact to produce complex phenotypes, with diet enhancing or reducing the  
597 consequences of mito-nuclear interactions. We now reveal specific nutrients which  
598 are sufficient to drive these effects. The nutrients we identify are of particular  
599 interest, because EAAs are currently attracting a great deal of attention for their  
600 extensive regulation of swathes of life-history and health traits, whilst lipid  
601 consumption is associated with the pandemic of metabolic disease in humans  
602 (Simpson and Raubenheimer, 2012). We now show that responses these nutrients  
603 are exaggerated in some mito-nuclear genotypes, and buffered in others. An  
604 additional, and perhaps more important novel finding, is that transgenerational  
605 effects of these nutrients can emerge in specific mito-nuclear genotypes. These  
606 interactions appear to explain substantial variance in reproductive traits and life-  
607 history. The Darwinian view that reproduction subjugates all other processes  
608 suggests that many further traits may be similarly regulated.

609

610 Transient dietary alterations and metabolic disease can drive persistent molecular  
611 and phenotypic change, within and across generations (Dobson et al., 2017; Duque-  
612 Guimarães and Ozanne, 2017; Holland et al., 2016; Stefana et al., 2017). Our study  
613 now shows that specific mito-nuclear genotypes are susceptible to a  
614 transgenerational effect of lipid nutrition. To our knowledge, this is the first  
615 demonstration of any form of genetic variation in transgenerational effects of diet.  
616 Currently, we do not know how this transgenerational effect of lipid is transmitted, but  
617 it may be due to altered epigenetic marks, nutrient provision from mother to  
618 offspring, or microbiota. It will be interesting in future work to ask whether mito-  
619 nuclear genotype shapes further aspects of non-genetic inheritance, and identify  
620 mechanisms. Epigenomic profiling will likely prove insightful. Lipids and mito-nuclear  
621 genotype may interact via mitochondrial metabolic processes such as beta-oxidation,  
622 or by affecting rates of mitochondrial fusion and fission (Senyilmaz et al., 2015). It  
623 will also be interesting to ask whether the transgenerational effects we have  
624 identified in F<sub>1</sub> descendants extend further, to subsequent generations. These  
625 findings indicate that detailed pedigrees containing both mitochondrial and nuclear  
626 information may be required to predict transgenerational effects of nutrition.  
627  
628 A significant outcome of our study is that impacts of diet on offspring quality and  
629 quantity do not necessarily correlate, and their relationship is subject to mito-nuclear  
630 variation. We were surprised that EAA enrichment did not enhance offspring  
631 development, because parental preference for laying eggs on this food led us to  
632 expect that EAAs would promote offspring anabolism. This discrepancy may indicate  
633 that EAAs function as signals of food quality as well as metabolites. This dual role

634 could drive deleterious outcomes when EAA levels are not representative of the  
635 composition of food that would be found in the yeasts which flies are thought to  
636 consume in nature. Alternatively, the discrepancy may prove an example of parent-  
637 offspring conflict (Trivers, 1974), in which EAAs promote parental fecundity, despite  
638 the detriment of reduced investment into individual offspring. How parent-offspring  
639 conflict is regulated at the interface of diet and genetic variation in general is not  
640 well-studied.

641

642 To our knowledge, our study is the first investigation of diet-mito-nuclear interactions  
643 to manipulate specific nutrient classes, rather than a complex ingredient such as  
644 yeast. Our finding that impacts of dietary lipid depend on mito-nuclear genotype may  
645 be relevant to understanding variation in impacts of high-fat human diets. The high-  
646 EAA diets that we used have parallels to high-protein anabolic diets used to increase  
647 yields of livestock and human muscle mass. Our findings that EAAs generally  
648 decrease offspring quality may give pause for thought in use of these diets.

649 Furthermore, the finding of mito-nuclear variation in the response to EAAs  
650 enrichment demonstrates that certain individuals may bear particularly strong costs  
651 of eating such diets. At present, we do not know the mechanistic basis of the diet-  
652 mito-nuclear interactions that we have uncovered, but the transgenerational effects  
653 hint at epigenetics, consistent with preceding findings that epigenetic marks respond  
654 to genetic variation in the cytoplasm (Bellizzi et al., 2012; Grunau et al., 2018; Vivian  
655 et al., 2017; Yan et al., 2011).

656

657 Our findings have implications for understanding variation that could emerge when  
658 novel mito-nuclear pairings come to be, such as after mitochondrial replacement  
659 therapy. Our results do not necessarily support the proposal to “match” mito-nuclear  
660 pairs as a positive predictor of therapeutic success (Dowling et al., 2010; Mossman  
661 et al., 2016a; Vaught et al., 2020), because a naturally co-occurring mito-nuclear pair  
662 (AA) responded uniquely to diet, suggesting that costs and benefits are not  
663 necessarily straightforward functions of mito-nuclear matching or mis-matching.  
664 Thus, comparing performance of matched versus unmatched groups may not be  
665 sufficient to evaluate risks of mitochondrial transfer therapy. Our analysis suggests  
666 that mitochondrial transfer may be variously deleterious, beneficial, or have  
667 unforeseen costs and benefits. Dietary recommendations may promote patient  
668 health. Our data also lend kudos to the suggestion of transgenerational effects of  
669 mitochondrial replacement therapy, especially when diet varies. A change of  
670 nomenclature may ultimately be called for, since “matched” and “mis-matched” carry  
671 intrinsic value judgments, but it seems that whether mitochondria and nuclei are of  
672 shared origin does not necessarily predict cost or benefit. We suggest that deep  
673 knowledge of patient and donor nuclear and mitochondrial genotype will likely be  
674 required to predict a healthy match.

675

676 Our results have wider implications for the conduct of nutritional and genetic  
677 research. Fly nutrition studies have drawn scrutiny for dietary variation between  
678 studies, attributed to methodological reporting (Lesperance and Broderick, 2020) and  
679 stochastic differences in ingredients (principally yeast) over time (Piper et al., 2014),  
680 which may limit repeatability. Similar issues can ensue after inconsistent

681 standardisation of genetic background (Burnett et al., 2011). The mito-nuclear field  
682 as a whole suggests that different outcomes are to be expected when mitochondrial  
683 and nuclear haplotypes are not carefully controlled by backcrossing, and our results  
684 indicate that variation between studies may be amplified when diet is manipulated.  
685 Even stochastic variation in diet may interact with mito-nuclear variation, making the  
686 case for careful reporting, and perhaps the use of chemically-defined media (Piper et  
687 al., 2014). Accounting for these sources of variation will likely improve repeatability.

688

689 In summary, we have shown that diet, mitochondrial and nuclear haplotype have  
690 complex interactive effects, each capable of modifying the impact of change in  
691 another. Dietary lipid and EAAs are both implicated separately in these interactions,  
692 with relevance not just for proximate reproductive output, but also for lasting  
693 transgenerational effects of diet which impact relative offspring fitness. These  
694 varying, mito-nuclear impacts of diet on offspring quantity and quality appear to be  
695 an important determinant of individual fitness and health.

696



697

## Materials & methods

698

### 699 Diets

700 Development medium contained 1.4% agar and 4.5% brewer's yeast (both

701 Gewürzmühle Brecht, Germany), 10% cornmeal and 11.1% sucrose (both Mühle

702 Milzitz, Germany) (all w/v), 0.45% propionic acid and 3% nipagin (v/v).

703

704 Experimental media build on published protocols (Bass et al., 2007; Dobson et al.,

705 2018; Emran et al., 2014). These media contained a final concentration of 10%

706 brewer's yeast, 5% sucrose, 1.5% agar (w/v), 3% nipagin and 0.3% propionic acid

707 (v/v). EAAs were purchased as powder (Sigma), and supplemented by dissolving

708 into a 6.66x solution in ddH<sub>2</sub>O pH 4.5 (final media concentrations: L-arginine 0.43 g/l,

709 L-histidine 0.21 g/l, L-isoleucine 0.34 g/l, L-leucine 0.48 g/l, L-lysine 0.52 g/l, L-

710 methionine 0.1 g/l, L-phenylalanine 0.26 g/l, L-threonine 0.37 g/l, L-tryptophan 0.09

711 g/l, L-valine 0.4 g/l). Margarine (*Ja! Pflanzenmargarine* from Rewe Supermarkets,

712 Germany; 720 kcal / 100g; 80/100g fat from 23/100g saturated fatty acids, 40/100g

713 monounsaturated fatty acids, 17/100g polyunsaturated fatty acids) was briefly melted

714 then mixed thoroughly into the food (15% w/v). Final nutrient contents of rearing and

715 control media were estimated using the *Drosophila* diet content calculator

716 (Lesperance and Broderick, 2020), with additional protein, lipid and caloric content

717 after nutrient supplements calculated according to margarine nutrient content report,

718 and by assuming caloric equity between EAAs and protein at a caloric value of 4

719 calories/g (USDA). Vials contained ~5ml of food, and were stored at 4°C for up to 1

720 week before use.

721

## 722 **Flies**

723 *D. melanogaster* fly lines were established as described in Figure 1 and maintained  
724 at 25°C on development medium throughout their history prior to our experiments.  
725 The ancestral Australian population was isolated in Coffs Harbour, NSW, Australia  
726 (Dowling et al., 2014). The Benin population is the widely-used *Dahomey* population,  
727 isolated in the 1970s in Dahomey (now Benin). Ancestral lines had been cured of the  
728 cytoplasmic endosymbiont *Wolbachia* 66 generations previously by tetracycline  
729 treatment prior to the experiment. For each fly line, 45 females of the desired  
730 mitochondrial background were crossed to 45 males of the desired nuclear  
731 background per generation. Iterating this process over many generations led to  
732 introgression of the desired nuclear background (from males) into each mitochondrial  
733 background. For experiments, flies were collected upon eclosion to adulthood and  
734 fed fresh developmental medium, before being pooled, split and assigned at random  
735 to experimental medium in groups of 5 males and 5 females. Experimental flies were  
736 maintained at 25°C, and transferred to fresh media every 48-72h for one week. Flies  
737 were transferred to fresh medium 24h before egg laying experiments. For  
738 development experiments, eggs were incubated at 25°C and pupation and eclosion  
739 were scored daily. Eclosing adults were lightly CO<sub>2</sub>-anaesthetised before counting  
740 and sexing.

741

742

## 743 **Analysis**

744 Data were analysed in R 3.6.1. Markdowns of all analyses are provided as  
745 supplementary material. Fit of fecundity data to a negative binomial distribution was  
746 determined with `firdistrplus::descdist` and `firdistrplus::fitdist`. Generalised linear mixed  
747 models of the form

748

749 
$$y \sim \text{diet} * \text{mitochondria} * \text{nuclear} + (\text{genotype})$$

750

751 were fit with `lme4::glmer.nb` (egg counts, negative binomial distribution) or  
752 `lme4::glmer` (binomial of egg counts before and after diet switch); in which *diet*  
753 (control/EAA/lipid), *mitochondria* (A/B) and *nuclear* (A/B) were fixed factors,  
754 genotype was a random factor denoting the full replicated genotype (e.g. AA1, AA2,  
755 AA3, AB1, AB2, BA1, etc). Where relevant (Figure 2), experimental replicate was  
756 also included as an additional random factor. Dispersion was assessed with  
757 `blmecco::dispersion_glmer`, and model singularity was tested with `lme4::isSingular`.  
758 Anova tests (type-3) were conducted with `car::Anova`, and *post-hoc* analyses were  
759 applied with the functions `emmeans::joint_tests`, `emmeans::pairs`, `emmeans::emmip`  
760 (Searle et al., 1980). AIC was determined with `stats::AIC`, Akaike weights with  
761 `MuMIn::dredge`. Four vials were excluded from the diet-switching experiment to  
762 enable model fitting, on the basis of extreme values (minimum and maximum  
763 observations in the experiment) or deviation from a QQ plot before diet switch.  
764 These data are retained, with note, in the data associated to this paper.

765

766 Censoring (i.e. failure to develop) was inferred per vial when n. emerging adults was  
767 less than n. eggs (noting assignment of zero censors when adult counts were

768 greater than eggs in some vials, due to measurement error). A 50:50 sex ratio was  
769 assumed amongst censors. Development to adult was modelled by fitting Cox mixed  
770 effects models of the form

771

$$772 \quad y \sim \text{diet} * \text{mitochondria} * \text{nuclear} * \text{sex} + \text{eggs} + \left( \frac{\text{genotype}}{\text{vial}} \right)$$

773

774 with `coxme::coxme`. *Diet*, *mitochondria*, *nuclear* and *genotype* terms were as in  
775 models of egg laying, and *vial* was an additional random effect nested in *genotype*.

776 *Eggs* coded number of eggs laid in the vial in which the individual developed, to

777 account for variation in rearing density. Pupal sex was unknown, so the sex term

778 was excluded from models of pupal development. Anova and *post-hoc* EMM tests

779 were conducted as per fecundity analyses, with additional stratification by sex when  
780 applying `emmeans::joint_tests`.

781

782 Figures were assembled in Adobe Illustrator. Mitochondria graphics were recoloured  
783 from files freely distributed under an open commons licence. The heatmap of nutrient  
784 content was plotted in R with the `superheat` library.

785

786

787

788

789

## **Acknowledgments**

790

791 We thank Steven Parratt and Colin Selman for valuable comments on drafts of the  
792 manuscript, and Luke Holman for advice on data analysis. Christin Froschauer and  
793 Ralph Dobler provided invaluable advice in setting up experiments. This work was  
794 supported by funds to KR from the Deutsche Forschungsgemeinschaft (Excellence  
795 Initiative to TU Dresden). AJD was supported by a Dresden Fellowship funded by the  
796 Excellence Initiative of the German Federal and State Governments, a UKRI Future  
797 Leaders Fellowship (MR/S033939/1) and a University of Glasgow Lord Kelvin Adam  
798 Smith Fellowship.

799

800

## **Declaration of interests**

801

802 The authors declare no competing interests.

803 **References**

- 804 Akaike H. 1974. A new look at the statistical model identification. *Ieee T Automat*  
805 *Contr* **19**:716–723. doi:10.1109/tac.1974.1100705
- 806 Aw WC, Towarnicki SG, Melvin RG, Youngson NA, Garvin MR, Hu Y, Nielsen S,  
807 Thomas T, Pickford R, Bustamante S, Vila-Sanjurjo A, Smyth GK, Ballard JWO.  
808 2018. Genotype to phenotype: Diet-by-mitochondrial DNA haplotype interactions  
809 drive metabolic flexibility and organismal fitness. *Plos Genet* **14**:e1007735.  
810 doi:10.1371/journal.pgen.1007735
- 811 Ballard JWO, Melvin RG. 2010. Linking the mitochondrial genotype to the organismal  
812 phenotype. *Mol Ecol* **19**:1523–1539. doi:10.1111/j.1365-294x.2010.04594.x
- 813 Baris TZ, Wagner DN, Dayan DI, Du X, Blier PU, Pichaud N, Oleksiak MF, Crawford  
814 DL. 2017. Evolved genetic and phenotypic differences due to mitochondrial-  
815 nuclear interactions. *Plos Genet* **13**:e1006517. doi:10.1371/journal.pgen.1006517
- 816 Barker DJP, Osmond C. 1986. Infant mortality, childhood nutrition, and ischaemic  
817 heart disease in England and Wales. *Lancet* **327**:1077–1081. doi:10.1016/s0140-  
818 6736(86)91340-1
- 819 Barker DJP, Thornburg KL. 2013. The Obstetric Origins of Health for a Lifetime. *Clin*  
820 *Obstet Gynecol* **56**:511–519. doi:10.1097/grf.0b013e31829cb9ca
- 821 Bass TM, Grandison RC, Wong R, Martinez P, Partridge L, Piper MDW. 2007.  
822 Optimization of Dietary Restriction Protocols in Drosophila. *Journals Gerontology*  
823 *Ser* **62**:1071–1081. doi:10.1093/gerona/62.10.1071

- 824 Bellizzi D, DAquila P, Giordano M, Montesanto A, Passarino G. 2012. Global DNA  
825 methylation levels are modulated by mitochondrial DNA variants. *Epigenomics-uk*  
826 **4**:17–27. doi:10.2217/epi.11.109
- 827 Bevers RPJ, Litovchenko M, Kapopoulou A, Braman VS, Robinson MR, Auwerx J,  
828 Hollis B, Deplancke B. 2019. Mitochondrial haplotypes affect metabolic  
829 phenotypes in the Drosophila Genetic Reference Panel. *Nat Metabolism* **1**:1226–  
830 1242. doi:10.1038/s42255-019-0147-3
- 831 Bong L-J, Neoh K-B, Lee C-Y, Jaal Z. 2014. Effect of Diet Quality on Survival and  
832 Reproduction of Adult *Paederus fuscipes* (Coleoptera: Staphylinidae). *J Med*  
833 *Entomol* **51**:752–759. doi:10.1603/me13145
- 834 Brankatschk M, Gutmann T, Knittelfelder O, Palladini A, Prince E, Grzybek M,  
835 Brankatschk B, Shevchenko A, Coskun Ü, Eaton S. 2018. A Temperature-  
836 Dependent Switch in Feeding Preference Improves Drosophila Development and  
837 Survival in the Cold. *Developmental Cell* **46**:781-793.e4.  
838 doi:10.1016/j.devcel.2018.05.028
- 839 Burnett C, Valentini S, Cabreiro F, Goss M, Somogyvári M, Piper MD, Hoddinott M,  
840 Sutphin GL, Leko V, McElwee JJ, Vazquez-Manrique RP, Orfila A-M, Ackerman  
841 D, Au C, Vinti G, Riesen M, Howard K, Neri C, Bedalov A, Kaerberlein M, Solti C,  
842 Partridge L, Gems D. 2011. Absence of effects of Sir2 overexpression on lifespan  
843 in *C. elegans* and *Drosophila*. *Nature* **477**:482–485. doi:10.1038/nature10296

- 844 Camilleri-Carter T-L, Dowling DK, Robker RL, Piper MDW. 2019. Transgenerational  
845 Obesity and Healthy Aging in *Drosophila*. *The Journals of Gerontology: Series A*.  
846 doi:10.1093/gerona/glz154
- 847 Camus MF, O'Leary M, Reuter M, Lane N. 2020. Impact of mitonuclear interactions  
848 on life-history responses to diet. *Philosophical Transactions Royal Soc B*  
849 **375**:20190416. doi:10.1098/rstb.2019.0416
- 850 Camus MF, Wolf JBW, Morrow EH, Dowling DK. 2015. Single Nucleotides in the  
851 mtDNA Sequence Modify Mitochondrial Molecular Function and Are Associated  
852 with Sex-Specific Effects on Fertility and Aging. *Curr Biol* **25**:2717–2722.  
853 doi:10.1016/j.cub.2015.09.012
- 854 Chang C-C, Rodriguez J, Ross J. 2016. Mitochondrial–Nuclear Epistasis Impacts  
855 Fitness and Mitochondrial Physiology of Interpopulation *Caenorhabditis briggsae*  
856 Hybrids. *G3 Genes Genomes Genetics* **6**:209–219. doi:10.1534/g3.115.022970
- 857 Cohen IG, Adashi EY, Gerke S, Palacios-González C, Ravitsky V. 2020. The  
858 Regulation of Mitochondrial Replacement Techniques Around the World. *Annu*  
859 *Rev Genom Hum G* **21**:1–22. doi:10.1146/annurev-genom-111119-101815
- 860 Craven L, Tuppen HA, Greggains GD, Harbottle SJ, Murphy JL, Cree LM, Murdoch  
861 AP, Chinnery PF, Taylor RW, Lightowlers RN, Herbert M, Turnbull DM. 2010.  
862 Pronuclear transfer in human embryos to prevent transmission of mitochondrial  
863 DNA disease. *Nature* **465**:82–85. doi:10.1038/nature08958



- 864 Crean AJ, Senior AM. 2019. High-fat diets reduce male reproductive success in  
865 animal models: A systematic review and meta-analysis. *Obesity Reviews* **20**:921–  
866 933. doi:10.1111/obr.12827
- 867 Deas JB, Blondel L, Extavour CG. 2019. Ancestral and offspring nutrition interact to  
868 affect life-history traits in *Drosophila melanogaster*. *Proceedings of the Royal*  
869 *Society B* **286**:20182778. doi:10.1098/rspb.2018.2778
- 870 Dobler R, Dowling DK, Morrow EH, Reinhardt K. 2018. A systematic review and  
871 meta-analysis reveals pervasive effects of germline mitochondrial replacement on  
872 components of health. *Hum Reprod Update* **24**:519–534.  
873 doi:10.1093/humupd/dmy018
- 874 Dobson AJ, Boulton-McDonald R, Houchou L, Svermova T, Ren Z, Subrini J,  
875 Vazquez-Prada M, Hoti M, Rodriguez-Lopez M, Ibrahim R, Gregoriou A,  
876 Gkantiragas A, Bähler J, Ezcurra M, Alic N. 2019. Longevity is determined by ETS  
877 transcription factors in multiple tissues and diverse species. *PLOS Genetics*  
878 **15**:e1008212. doi:10.1371/journal.pgen.1008212
- 879 Dobson AJ, Chaston JM, Newell PD, Donahue L, Hermann SL, Sannino DR,  
880 Westmiller S, Wong AC, Clark AG, Lazzaro BP, Douglas AE. 2015. Host genetic  
881 determinants of microbiota-dependent nutrition revealed by genome-wide analysis  
882 of *Drosophila melanogaster*. *Nature communications* **6**:6312.  
883 doi:10.1038/ncomms7312

- 884 Dobson AJ, Ezcurra M, Flanagan CE, Summerfield AC, Piper MDW, Gems D, Alic N.  
885 2017. Nutritional Programming of Lifespan by FOXO Inhibition on Sugar-Rich  
886 Diets. *Cell Reports* **18**:299–306. doi:10.1016/j.celrep.2016.12.029
- 887 Dobson AJ, He X, Blanc E, Bolukbasi E, Feseha Y, Yang M, Piper MD. 2018.  
888 Tissue-specific transcriptome profiling of *Drosophila* reveals roles for GATA  
889 transcription factors in longevity by dietary restriction. *npj Aging and Mechanisms*  
890 *of Disease* **4**. doi:10.1038/s41514-018-0024-4
- 891 Dong H-J, Wu D, Xu S-Y, Li Q, Fang Z-F, Che L-Q, Wu C-M, Xu X-Y, Lin Y. 2016.  
892 Effect of dietary supplementation with amino acids on boar sperm quality and  
893 fertility. *Anim Reprod Sci* **172**:182–189. doi:10.1016/j.anireprosci.2016.08.003
- 894 Đorđević M, Stojković B, Savković U, Immonen E, Tucić N, Lazarević J, Arnqvist G.  
895 2017. Sex-specific mitonuclear epistasis and the evolution of mitochondrial  
896 bioenergetics, ageing, and life history in seed beetles. *Evolution* **71**:274–288.  
897 doi:10.1111/evo.13109
- 898 Dowling DK, Friberg U, Lindell J. 2008. Evolutionary implications of non-neutral  
899 mitochondrial genetic variation. *Trends Ecol Evol* **23**:546–554.  
900 doi:10.1016/j.tree.2008.05.011
- 901 Dowling DK, Meerupati T, Arnqvist G. 2010. Cytonuclear Interactions and the  
902 Economics of Mating in Seed Beetles. *Am Nat* **176**:131–140. doi:10.1086/653671

- 903 Dowling DK, Williams BR, Garcia-Gonzalez F. 2014. Maternal sexual interactions  
904 affect offspring survival and ageing. *J Evolution Biol* **27**:88–97.  
905 doi:10.1111/jeb.12276
- 906 Drummond E, Short E, Clancy D. 2019. Mitonuclear gene X environment effects on  
907 lifespan and health: How common, how big? *Mitochondrion* **49**:12–18.  
908 doi:10.1016/j.mito.2019.06.009
- 909 Dunham-Snary KJ, Ballinger SW. 2015. Mitochondrial-nuclear DNA mismatch  
910 matters. *Science* **349**:1449–1450. doi:10.1126/science.aac5271
- 911 Duque-Guimarães D, Ozanne S. 2017. Early nutrition and ageing: can we intervene?  
912 *Biogerontology* **18**:893–900. doi:10.1007/s10522-017-9691-y
- 913 Eisenberg T, Schroeder S, Andryushkova A, Pendl T, Küttner V, Bhukel A, Mariño G,  
914 Pietrocola F, Harger A, Zimmermann A, Moustafa T, Sprenger A, Jany E, Büttner  
915 S, Carmona-Gutierrez D, Ruckenstuhl C, Ring J, Reichelt W, Schimmel K, Leeb  
916 T, Moser C, Schatz S, Kamolz L-P, Magnes C, Sinner F, Sedej S, Fröhlich K-U,  
917 Juhasz G, Pieber TR, Dengjel J, Sigrist SJ, Kroemer G, Madeo F. 2014.  
918 Nucleocytosolic Depletion of the Energy Metabolite Acetyl-Coenzyme A  
919 Stimulates Autophagy and Prolongs Lifespan. *Cell Metab* **19**:431–444.  
920 doi:10.1016/j.cmet.2014.02.010
- 921 Ellison CK, Burton RS. 2006. Disruption of mitochondrial function in interpopulation  
922 hybrids of *Tigriopus californicus*. *Evolution* **60**:1382–1391. doi:10.1554/06-210.1

- 923 Emran S, Yang M, He X, Zandveld J, Piper MD. 2014. Target of rapamycin signalling  
924 mediates the lifespan-extending effects of dietary restriction by essential amino  
925 acid alteration. *Aging* **6**:390–8.
- 926 Fanson BG, Fanson KV, Taylor PW. 2012. Cost of reproduction in the Queensland  
927 fruit fly: Y-model versus lethal protein hypothesis. *Proc Royal Soc B Biological Sci*  
928 **279**:4893–4900. doi:10.1098/rspb.2012.2033
- 929 Fontana L, Partridge L, Longo VD. 2010. Extending Healthy Life Span—From Yeast  
930 to Humans. *Science* **328**:321–326. doi:10.1126/science.1172539
- 931 Gemmell NJ, Metcalf VJ, Allendorf FW. 2004. Mother’s curse: the effect of mtDNA  
932 on individual fitness and population viability. *Trends Ecol Evol* **19**:238–244.  
933 doi:10.1016/j.tree.2004.02.002
- 934 Gershoni M, Templeton AR, Mishmar D. 2009. Mitochondrial bioenergetics as a  
935 major motive force of speciation. *Bioessays* **31**:642–650.  
936 doi:10.1002/bies.200800139
- 937 Gorman GS, Chinnery PF, DiMauro S, Hirano M, Koga Y, McFarland R,  
938 Suomalainen A, Thorburn DR, Zeviani M, Turnbull DM. 2016. Mitochondrial  
939 diseases. *Nat Rev Dis Primers* **2**:16080. doi:10.1038/nrdp.2016.80
- 940 Grandison RC, Piper MD, Partridge L. 2009. Amino-acid imbalance explains  
941 extension of lifespan by dietary restriction in *Drosophila*. *Nature* **462**:1061–1064.  
942 doi:10.1038/nature08619

- 943 Grunau C, Voigt S, Dobler R, Dowling DK, Reinhardt K. 2018. The Cytoplasm  
944 Affects the Epigenome in *Drosophila melanogaster*. *Epigenomes* **2**:17.  
945 doi:10.3390/epigenomes2030017
- 946 Hariri N, Thibault L. 2010. High-fat diet-induced obesity in animal models. *Nutr Res*  
947 *Rev* **23**:270–99. doi:10.1017/s0954422410000168
- 948 Havird JC, Hall MD, Dowling DK. 2015. The evolution of sex: A new hypothesis  
949 based on mitochondrial mutational erosion. *Bioessays* **37**:951–958.  
950 doi:10.1002/bies.201500057
- 951 Healy TM, Burton RS. 2020. Strong selective effects of mitochondrial DNA on the  
952 nuclear genome. *P Natl Acad Sci Usa* **117**:6616–6621.  
953 doi:10.1073/pnas.1910141117
- 954 Heymsfield SB, Wadden TA. 2017. Mechanisms, Pathophysiology, and Management  
955 of Obesity. *New Engl J Med* **376**:254–266. doi:10.1056/nejmra1514009
- 956 Hill GE. 2019. Reconciling the mitonuclear compatibility species concept with  
957 rampant mitochondrial introgression. *Integr Comp Biol* **59**:912–924.  
958 doi:10.1093/icb/icz019
- 959 Hill GE. 2017. The mitonuclear compatibility species concept. *Auk* **134**:393–409.  
960 doi:10.1642/auk-16-201.1
- 961 Holland ML, Lowe R, Caton PW, Gemma C, Carbajosa G, Danson AF, Carpenter  
962 AA, Loche E, Ozanne SE, Rakyan VK. 2016. Early-life nutrition modulates the

- 963 epigenetic state of specific rDNA genetic variants in mice. *Science (New York,*  
964 *NY)* **353**:495–8. doi:10.1126/science.aaf7040
- 965 Human Fertility and Embryology Authority. 2016. Scientific review of the safety and  
966 efficacy of methods to avoid mitochondrial disease through assisted conception:  
967 2016 update.
- 968 Innocenti P, Morrow EH, Dowling DK. 2011. Experimental Evidence Supports a Sex-  
969 Specific Selective Sieve in Mitochondrial Genome Evolution. *Science* **332**:845–  
970 848. doi:10.1126/science.1201157
- 971 Jang C, Hui S, Lu W, Cowan AJ, Morscher RJ, Lee G, Liu W, Tesz GJ, Birnbaum  
972 MJ, Rabinowitz JD. 2018. The Small Intestine Converts Dietary Fructose into  
973 Glucose and Organic Acids. *Cell Metab* **27**:351-361.e3.  
974 doi:10.1016/j.cmet.2017.12.016
- 975 Jensen K, McClure C, Priest NK, Hunt J. 2015. Sex-specific effects of protein and  
976 carbohydrate intake on reproduction but not lifespan in *Drosophila melanogaster*.  
977 *Aging Cell* **14**:605–615. doi:10.1111/accel.12333
- 978 Jumbo-Lucioni P, Ayroles JF, Chambers M, Jordan KW, Leips J, Mackay TF, Luca  
979 M. 2010. Systems genetics analysis of body weight and energy metabolism traits  
980 in *Drosophila melanogaster*. *BMC Genomics* **11**:297. doi:10.1186/1471-2164-11-  
981 297
- 982 Knittelfelder O, Prince E, Sales S, Fritzsche E, Wöhner T, Brankatschk M,  
983 Shevchenko A. 2020. Sterols as dietary markers for *Drosophila melanogaster*.

984 *Biochimica Et Biophysica Acta Bba - Mol Cell Biology Lipids* **1865**:158683.

985 doi:10.1016/j.bbalip.2020.158683

986 Lack D. 1947. The significance of clutch size in birds. *Ibis* 302–352.

987 Latorre-Pellicer A, Lechuga-Vieco AV, Johnston IG, Hämäläinen RH, Pellico J,

988 Justo-Méndez R, Fernández-Toro JM, Clavería C, Guaras A, Sierra R, Llop J,

989 Torres M, Criado LM, Suomalainen A, Jones NS, Ruíz-Cabello J, Enríquez JA.

990 2019. Regulation of Mother-to-Offspring Transmission of mtDNA Heteroplasmy.

991 *Cell Metab* **30**:1120-1130.e5. doi:10.1016/j.cmet.2019.09.007

992 Lee K, Simpson SJ, Clissold FJ, Brooks R, Ballard WJ, Taylor PW, Soran N,

993 Raubenheimer D. 2008. Lifespan and reproduction in *Drosophila*: New insights

994 from nutritional geometry. *Proceedings of the National Academy of Sciences*

995 **105**:2498–2503. doi:10.1073/pnas.0710787105

996 Leitão-Gonçalves R, Carvalho-Santos Z, Francisco A, Fioreze G, Anjos M, Baltazar

997 C, Elias A, Itskov PM, Piper MD, Ribeiro C. 2017. Commensal bacteria and

998 essential amino acids control food choice behavior and reproduction. *PLOS*

999 *Biology* **15**:e2000862. doi:10.1371/journal.pbio.2000862

1000 Lesperance DNA, Broderick NA. 2020. Meta-analysis of Diets Used in *Drosophila*

1001 Microbiome Research and Introduction of the *Drosophila* Dietary Composition

1002 Calculator (DDCC). *G3 Genes Genomes Genetics* **10**:g3.401235.2020.

1003 doi:10.1534/g3.120.401235

- 1004 Li X, Shi X, Hou Y, Cao X, Gong L, Wang H, Li Jiayu, Li Jibin, Wu C, Xiao D, Qi H,  
1005 Xiao X. 2018. Paternal hyperglycemia induces transgenerational inheritance of  
1006 susceptibility to hepatic steatosis in rats involving altered methylation on Ppara  
1007 promoter. *Biochimica Et Biophysica Acta Mol Basis Dis* **1865**:147–160.  
1008 doi:10.1016/j.bbadis.2018.10.040
- 1009 Liang H, Zhang Z. 2006. Food restriction affects reproduction and survival of F1 and  
1010 F2 offspring of Rat-like hamster (*Cricetulus triton*). *Physiol Behav* **87**:607–613.  
1011 doi:10.1016/j.physbeh.2005.12.006
- 1012 Liao C-Y, Rikke BA, Johnson TE, Diaz V, Nelson JF. 2009. Genetic variation in the  
1013 murine lifespan response to dietary restriction: from life extension to life  
1014 shortening. *Aging Cell* **9**:92–5. doi:10.1111/j.1474-9726.2009.00533.x
- 1015 Ma C, Mirth CK, Hall MD, Piper MDW. 2020. Amino acid quality modifies the  
1016 quantitative availability of protein for reproduction in *Drosophila melanogaster*. *J*  
1017 *Insect Physiol* 104050. doi:10.1016/j.jinsphys.2020.104050
- 1018 Ma H, Gutierrez NM, Morey R, Dyken CV, Kang E, Hayama T, Lee Y, Li Y, Tippner-  
1019 Hedges R, Wolf DP, Laurent LC, Mitalipov S. 2016. Incompatibility between  
1020 Nuclear and Mitochondrial Genomes Contributes to an Interspecies Reproductive  
1021 Barrier. *Cell Metab* **24**:283–94. doi:10.1016/j.cmet.2016.06.012
- 1022 Maklakov AA, Lummaa V. 2013. Evolution of sex differences in lifespan and aging:  
1023 Causes and constraints. *BioEssays* **35**:717–724. doi:10.1002/bies.201300021



- 1024 Maklakov AA, Simpson SJ, Zajitschek F, Hall MD, Dessmann J, Clissold F,  
1025 Raubenheimer D, Bonduriansky R, Brooks RC. 2008. Sex-Specific Fitness Effects  
1026 of Nutrient Intake on Reproduction and Lifespan. *Curr Biol* **18**:1062–1066.  
1027 doi:10.1016/j.cub.2008.06.059
- 1028 Mariño G, Pietrocola F, Eisenberg T, Kong Y, Malik SA, Andryushkova A, Schroeder  
1029 S, Pendl T, Harger A, Niso-Santano M, Zamzami N, Scoazec M, Durand S, Enot  
1030 DP, Fernández ÁF, Martins I, Kepp O, Senovilla L, Bauvy C, Morselli E, Vacchelli  
1031 E, Bennetzen M, Magnes C, Sinner F, Pieber T, López-Otín C, Maiuri MC,  
1032 Codogno P, Andersen JS, Hill JA, Madeo F, Kroemer G. 2014. Regulation of  
1033 Autophagy by Cytosolic Acetyl-Coenzyme A. *Mol Cell* **53**:710–725.  
1034 doi:10.1016/j.molcel.2014.01.016
- 1035 McCracken AW, Adams G, Hartshorne L, Tatar M, Simons MJP. 2020. The hidden  
1036 costs of dietary restriction: Implications for its evolutionary and mechanistic  
1037 origins. *Sci Adv* **6**:eaay3047. doi:10.1126/sciadv.aay3047
- 1038 Meiklejohn CD, Holmbeck MA, Siddiq MA, Abt DN, Rand DM, Montooth KL. 2013.  
1039 An Incompatibility between a Mitochondrial tRNA and Its Nuclear-Encoded tRNA  
1040 Synthetase Compromises Development and Fitness in *Drosophila*. *Plos Genet*  
1041 **9**:e1003238. doi:10.1371/journal.pgen.1003238
- 1042 Milot E, Moreau C, Gagnon A, Cohen AA, Brais B, Labuda D. 2017. Mother’s curse  
1043 neutralizes natural selection against a human genetic disease over three  
1044 centuries. *Nat Ecol Evol* **1**:1400–1406. doi:10.1038/s41559-017-0276-6

- 1045 Mirth CK, Alves AN, Piper MD. 2018. Turning Food Into Eggs: insights from  
1046 nutritional biology and developmental physiology of *Drosophila*. *Curr Opin Insect*  
1047 *Sci* **31**:49–57. doi:10.1016/j.cois.2018.08.006
- 1048 Montooth KL, Dhawanjewar AS, Meiklejohn CD. 2019. Temperature-sensitive  
1049 reproduction and the physiological and evolutionary potential for Mother’s Curse.  
1050 *Integr Comp Biol* **59**:890–899. doi:10.1093/icb/icz091
- 1051 Mossman JA, Biancani LM, Rand DM. 2019. Mitochondrial genomic variation drives  
1052 differential nuclear gene expression in discrete regions of *Drosophila* gene and  
1053 protein interaction networks. *Bmc Genomics* **20**:691. doi:10.1186/s12864-019-  
1054 6061-y
- 1055 Mossman JA, Biancani LM, Zhu C-T, Rand DM. 2016a. Mitonuclear Epistasis for  
1056 Development Time and Its Modification by Diet in *Drosophila*. *Genetics* **203**:463–  
1057 484. doi:10.1534/genetics.116.187286
- 1058 Mossman JA, Tross JG, Li N, Wu Z, Rand DM. 2016b. Mitochondrial-Nuclear  
1059 Interactions Mediate Sex-Specific Transcriptional Profiles in *Drosophila*. *Genetics*  
1060 **204**:genetics.116.192328. doi:10.1534/genetics.116.192328
- 1061 Mulvey L, Sands WA, Salin K, Carr AE, Selman C. 2017. Disentangling the effect of  
1062 dietary restriction on mitochondrial function using recombinant inbred mice.  
1063 *Molecular and cellular endocrinology* **455**:41–53. doi:10.1016/j.mce.2016.09.001
- 1064 Nagarajan-Radha V, Aitkenhead I, Clancy DJ, Chown SL, Dowling DK. 2020. Sex-  
1065 specific effects of mitochondrial haplotype on metabolic rate in *Drosophila*

- 1066 melanogaster support predictions of the Mother's Curse hypothesis. *Philosophical*  
1067 *Transactions Royal Soc B* **375**:20190178. doi:10.1098/rstb.2019.0178
- 1068 Nagarajan-Radha V, Rapkin J, Hunt J, Dowling DK. 2019. Interactions Between  
1069 Mitochondrial Haplotype and Dietary Macronutrient Ratios Confer Sex-Specific  
1070 Effects on Longevity in *Drosophila melanogaster*. *The Journals of Gerontology:*  
1071 *Series A* 1573–1581. doi:10.1093/gerona/glz104
- 1072 Ordovas JM, Ferguson LR, Tai ES, Mathers JC. 2018. Personalised nutrition and  
1073 health. *Bmj Clin Res Ed* **361**:bmj.k2173. doi:10.1136/bmj.k2173
- 1074 Öst A, Lempradl A, Casas E, Weigert M, Tiko T, Deniz M, Pantano L, Boenisch U,  
1075 Itskov PM, Stoeckius M, Ruf M, Rajewsky N, Reuter G, Iovino N, Ribeiro C,  
1076 Alenius M, Heyne S, Vavouri T, Pospisilik AJ. 2014. Paternal Diet Defines  
1077 Offspring Chromatin State and Intergenerational Obesity. *Cell* **159**.  
1078 doi:10.1016/j.cell.2014.11.005
- 1079 Piper MD, Blanc E, Leitão-Gonçalves R, Yang M, He X, Linford NJ, Hoddinott MP,  
1080 Hopfen C, Soultoukis GA, Niemeyer C, Kerr F, Pletcher SD, Ribeiro C, Partridge  
1081 L. 2014. A holidic medium for *Drosophila melanogaster*. *Nature Methods* **11**:100–  
1082 105. doi:10.1038/nmeth.2731
- 1083 Rand DM, Mossman JA, Zhu L, Biancani LM, Ge JY. 2018. Mitonuclear epistasis,  
1084 genotype-by-environment interactions, and personalized genomics of complex  
1085 traits in *Drosophila*: Mitonuclear G x G x E. *Iubmb Life* **70**:1275–1288.  
1086 doi:10.1002/iub.1954

- 1087 Reinhardt K, Dowling DK, Morrow EH. 2013. Mitochondrial Replacement, Evolution,  
1088 and the Clinic. *Science* **341**:1345–1346. doi:10.1126/science.1237146
- 1089 Rikke BA, Liao C-Y, McQueen MB, Nelson JF, Johnson TE. 2010. Genetic  
1090 dissection of dietary restriction in mice supports the metabolic efficiency model of  
1091 life extension. *Exp Gerontol* **45**:691–701. doi:10.1016/j.exger.2010.04.008
- 1092 Rivera HM, Kievit P, Kirigiti MA, Bauman LA, Baquero K, Blundell P, Dean TA,  
1093 Valleau JC, Takahashi DL, Frazee T, Douville L, Majer J, Smith MS, Grove KL,  
1094 Sullivan EL. 2015. Maternal high-fat diet and obesity impact palatable food intake  
1095 and dopamine signaling in nonhuman primate offspring. *Obes Silver Spring Md*  
1096 **23**:2157–64. doi:10.1002/oby.21306
- 1097 Saud S, Summerfield AC, Alic N. 2015. Ablation of insulin-producing cells prevents  
1098 obesity but not premature mortality caused by a high-sugar diet in *Drosophila*.  
1099 *Proceedings of the Royal Society of London B: Biological Sciences*  
1100 **282**:20141720. doi:10.1098/rspb.2014.1720
- 1101 Searle SR, Speed FM, Milliken GA. 1980. Population Marginal Means in the Linear  
1102 Model: An Alternative to Least Squares Means. *Am Statistician* **34**:216–221.  
1103 doi:10.1080/00031305.1980.10483031
- 1104 Senyilmaz D, Virtue S, Xu X, Tan CY, Griffin JL, Miller AK, Vidal-Puig A, Telemán  
1105 AA. 2015. Regulation of mitochondrial morphology and function by stearylolation  
1106 of TFR1. *Nature* **525**:124–128. doi:10.1038/nature14601

- 1107 Simpson SJ, Raubenheimer D. 2012. The Nature of Nutrition.  
1108 doi:10.1515/9781400842803
- 1109 Skorupa DA, Dervisevendic A, Zwiener J, Pletcher SD. 2008. Dietary composition  
1110 specifies consumption, obesity, and lifespan in *Drosophila melanogaster*. *Aging*  
1111 *Cell* **7**:478–490. doi:10.1111/j.1474-9726.2008.00400.x
- 1112 Smith HG, Kallander H, Nilsson J-A. 1989. The Trade-Off Between Offspring  
1113 Number and Quality in the Great Tit *Parus major*. *J Animal Ecol* **58**:383.  
1114 doi:10.2307/4837
- 1115 Solon-Biet SM, Walters KA, Simanainen UK, McMahon AC, Ruohonen K, Ballard  
1116 JO, Raubenheimer D, Handelsman DJ, Couteur DG, Simpson SJ. 2015.  
1117 Macronutrient balance, reproductive function, and lifespan in aging mice.  
1118 *Proceedings of the National Academy of Sciences* **112**:3481–3486.  
1119 doi:10.1073/pnas.1422041112
- 1120 Stearns SC. 1992. The evolution of life histories. Oxford University Press.
- 1121 Stefana IM, Driscoll PC, Obata F, Pengelly A, Newell CL, MacRae JI, Gould AP.  
1122 2017. Developmental diet regulates *Drosophila* lifespan via lipid autotoxins.  
1123 *Nature Communications* **8**:1384. doi:10.1038/s41467-017-01740-9
- 1124 Svajgr AJ, Hammell DL, DeGeeter MJ, Hays VW, Cromwell GL, Dutt RH. 1972.  
1125 Reproductive performance of sows on a protein-restricted diet. *Reproduction*  
1126 **30**:455–458. doi:10.1530/jrf.0.0300455

- 1127 Tachibana M, Kuno T, Yaegashi N. 2018. Mitochondrial replacement therapy and  
1128 assisted reproductive technology: A paradigm shift toward treatment of genetic  
1129 diseases in gametes or in early embryos. *Reproductive Medicine Biology* **17**:421–  
1130 433. doi:10.1002/rmb2.12230
- 1131 Towarnicki SG, Ballard JWO. 2018. Mitotype Interacts With Diet to Influence  
1132 Longevity, Fitness, and Mitochondrial Functions in Adult Female *Drosophila*.  
1133 *Frontiers in Genetics* **9**:593. doi:10.3389/fgene.2018.00593
- 1134 Towarnicki SG, Ballard JWO. 2017. *Drosophila* mitotypes determine developmental  
1135 time in a diet and temperature dependent manner. *Journal of Insect Physiology*  
1136 **100**. doi:10.1016/j.jinsphys.2017.06.002
- 1137 Trefely S, Lovell CD, Snyder NW, Wellen KE. 2020. Compartmentalized acyl-CoA  
1138 metabolism and roles in chromatin regulation. *Mol Metab* **38**:100941.  
1139 doi:10.1016/j.molmet.2020.01.005
- 1140 Trivers RL. 1974. Parent-Offspring Conflict. *Am Zool* **14**:249–264.  
1141 doi:10.1093/icb/14.1.249
- 1142 Tufarelli V, Lacalandra G, Laudadio V. 2015. Reproductive and Metabolic  
1143 Responses of Early-lactating Dairy Cows Fed Different Dietary Protein Sources.  
1144 *Reprod Domest Anim* **50**:735–739. doi:10.1111/rda.12566
- 1145 Vaught RC, Voigt S, Dobler R, Clancy DJ, Reinhardt K, Dowling DK. 2020.  
1146 Interactions between cytoplasmic and nuclear genomes confer sex-specific

- 1147 effects on lifespan in *Drosophila melanogaster*. *J Evolution Biol* **33**:694–713.  
1148 doi:10.1111/jeb.13605
- 1149 Vivian CJ, Brinker AE, Graw S, Koestler DC, Legendre C, Gooden GC, Salhia B,  
1150 Welch DR. 2017. Mitochondrial Genomic Backgrounds Affect Nuclear DNA  
1151 Methylation and Gene Expression. *Cancer Res* **77**:6202–6214. doi:10.1158/0008-  
1152 5472.can-17-1473
- 1153 Wagenmakers E-J, Farrell S. 2004. AIC model selection using Akaike weights.  
1154 *Psychon B Rev* **11**:192–196. doi:10.3758/bf03206482
- 1155 Wallace DC, Chalkia D. 2013. Mitochondrial DNA Genetics and the Heteroplasmy  
1156 Conundrum in Evolution and Disease. *Csh Perspect Biol* **5**:a021220.  
1157 doi:10.1101/cshperspect.a021220
- 1158 Wei Y, Yang C-R, Wei Y-P, Zhao Z-A, Hou Y, Schatten H, Sun Q-Y. 2014. Paternally  
1159 induced transgenerational inheritance of susceptibility to diabetes in mammals. *P*  
1160 *Natl Acad Sci Usa* **111**:1873–8. doi:10.1073/pnas.1321195111
- 1161 Winship AL, Gazzard SE, Cullen-McEwen LA, Bertram JF, Hutt KJ. 2018. Maternal  
1162 low-protein diet programmes low ovarian reserve in offspring. *Reproduction*  
1163 **156**:299–311. doi:10.1530/rep-18-0247
- 1164 Wolf DP, Mitalipov N, Mitalipov S. 2015. Mitochondrial replacement therapy in  
1165 reproductive medicine. *Trends Mol Med* **21**:68–76.  
1166 doi:10.1016/j.molmed.2014.12.001

- 1167 Wong AC-N, Dobson AJ, Douglas AE. 2014a. Gut microbiota dictates the metabolic  
1168 response of *Drosophila* to diet. *J Exp Biology* **217**:1894–1901.  
1169 doi:10.1242/jeb.101725
- 1170 Woodcock KJ, Kierdorf K, Pouchelon CA, Vivancos V, Dionne MS, Geissmann F.  
1171 2015. Macrophage-Derived upd3 Cytokine Causes Impaired Glucose  
1172 Homeostasis and Reduced Lifespan in *Drosophila* Fed a Lipid-Rich Diet.  
1173 *Immunity* **42**:133–144. doi:10.1016/j.immuni.2014.12.023
- 1174 Yan H, Yan Z, Ma Q, Jiao F, Huang S, Zeng F, Zeng Y. 2011. Association between  
1175 mitochondrial DNA haplotype compatibility and increased efficiency of bovine  
1176 intersubspecies cloning. *J Genet Genomics* **38**:21–28.  
1177 doi:10.1016/j.jcg.2010.12.003
- 1178 Zanco B, Mirth CK, Sgrò CM, Piper MDW. 2020. A dietary sterol trade off determines  
1179 lifespan responses to dietary restriction in *Drosophila melanogaster*. *Biorxiv*  
1180 2020.08.21.260489. doi:10.1101/2020.08.21.260489
- 1181 Zhao S, Jang C, Liu J, Uehara K, Gilbert M, Izzo L, Zeng X, Trefely S, Fernandez S,  
1182 Carrer A, Miller KD, Schug ZT, Snyder NW, Gade TP, Titchenell PM, Rabinowitz  
1183 JD, Wellen KE. 2020. Dietary fructose feeds hepatic lipogenesis via microbiota-  
1184 derived acetate. *Nature* **579**:586–591. doi:10.1038/s41586-020-2101-7
- 1185 Zhu C-T, Ingelmo P, Rand DM. 2014. G×G×E for Lifespan in *Drosophila*:  
1186 Mitochondrial, Nuclear, and Dietary Interactions that Modify Longevity. *PLoS*  
1187 *Genetics* **10**. doi:10.1371/journal.pgen.1004354



1188

**Table S1. GLMM of fecundity across diets and mito-nuclear haplotypes**

| Term              | Chisq    | Df | Pr(> $\chi^2$ ) |
|-------------------|----------|----|-----------------|
| (Intercept)       | 4342.751 | 1  | <2.20E-16       |
| mito              | 8.3384   | 1  | 0.0039          |
| nuclear           | 13.6946  | 1  | 0.0002          |
| diet              | 314.9242 | 2  | <2.20E-16       |
| mito:nuclear      | 6.5883   | 1  | 0.0103          |
| mito:diet         | 10.2151  | 2  | 0.0061          |
| nuclear:diet      | 0.2024   | 2  | 0.9036          |
| mito:nuclear:diet | 9.3347   | 2  | 0.0094          |

**Table S2. Pairwise comparisons of fecundity across diets and mito-nuclear haplotypes**

| diet | contrast | estimate  | SE     | Z ratio | P value |
|------|----------|-----------|--------|---------|---------|
| sya  | AA vs BA | 0.264859  | 0.0917 | 2.888   | 0.0203  |
|      | AA vs AB | 0.32267   | 0.0872 | 3.701   | 0.0012  |
|      | AA vs BB | 0.262022  | 0.0871 | 3.008   | 0.014   |
|      | BA vs AB | 0.057811  | 0.0922 | 0.627   | 0.9233  |
|      | BA vs BB | -0.002838 | 0.092  | -0.031  | 1       |
|      | AB vs BB | -0.060649 | 0.0876 | -0.692  | 0.9001  |
| EAA  | AA vs BA | 0.04355   | 0.0918 | 0.474   | 0.9648  |
|      | AA vs AB | 0.362769  | 0.0865 | 4.193   | 0.0002  |
|      | AA vs BB | 0.363417  | 0.0866 | 4.199   | 0.0002  |

|     |          |          |        |        |        |
|-----|----------|----------|--------|--------|--------|
|     | BA vs AB | 0.319219 | 0.0922 | 3.464  | 0.003  |
|     | BA vs BB | 0.319866 | 0.092  | 3.475  | 0.0029 |
|     | AB vs BB | 0.000647 | 0.087  | 0.007  | 1      |
|     | AA vs BA | -0.09705 | 0.097  | -1.001 | 0.7491 |
|     | AA vs AB | 0.365225 | 0.0932 | 3.918  | 0.0005 |
|     | AA vs BB | 0.42652  | 0.0935 | 4.56   | <.0001 |
| mar | BA vs AB | 0.462275 | 0.0982 | 4.706  | <.0001 |
|     | BA vs BB | 0.523571 | 0.0986 | 5.309  | <.0001 |
|     | AB vs BB | 0.061296 | 0.0951 | 0.645  | 0.9174 |

**Table S3. Development on experimental diets: Cox Mixed-Effects model of adult emergence, sex-stratified posterior analysis by Estimated Marginal Means**

| Sex    | Term              | Df | F ratio | P      |
|--------|-------------------|----|---------|--------|
|        | mito              | 1  | 15.517  | 0.0001 |
|        | nuclear           | 1  | 13.541  | 0.0002 |
|        | diet              | 2  | 322.17  | <.0001 |
| female | mito:nuclear      | 1  | 20.686  | <.0001 |
|        | mito:diet         | 2  | 25.789  | <.0001 |
|        | nuclear:diet      | 2  | 16.855  | <.0001 |
|        | mito:nuclear:diet | 2  | 25.733  | <.0001 |
| male   | mito              | 1  | 10.307  | 0.0013 |
|        | nuclear           | 1  | 0.223   | 0.6371 |

|                   |   |         |        |
|-------------------|---|---------|--------|
| diet              | 2 | 226.121 | <.0001 |
| mito:nuclear      | 1 | 16.511  | <.0001 |
| mito:diet         | 2 | 8.529   | 0.0002 |
| nuclear:diet      | 2 | 15.201  | <.0001 |
| mito:nuclear:diet | 2 | 7.778   | 0.0004 |

**Table S4. Development on experimental diets: Cox Mixed-Effects model of egg-pupa survival**

| Term              | Chisq | Df      | Pr(> $\chi^2$ ) |
|-------------------|-------|---------|-----------------|
| mito              | 1     | 129.732 | <2.20E-16       |
| nuclear           | 1     | 148.282 | <2.20E-16       |
| diet              | 2     | 146.228 | <2.20E-16       |
| eggs              | 1     | 12.377  | 0.0004          |
| mito:nuclear      | 1     | 66.987  | 2.73E-16        |
| mito:diet         | 2     | 74.55   | <2.20E-16       |
| nuclear:diet      | 2     | 90.713  | <2.20E-16       |
| mito:nuclear:diet | 2     | 35.714  | 1.76E-08        |

**Table S5. Fecundity before switch from experimental diets: GLMM of egg laying across mito-nuclear haplotypes, after feeding on experimental diets**

| Term        | Chisq     | Df | Pr(> $\chi^2$ ) |
|-------------|-----------|----|-----------------|
| (Intercept) | 1748.5684 | 1  | <2.20E-16       |
| mito        | 1.1888    | 1  | 0.2756          |
| nuclear     | 2.2325    | 1  | 0.1351          |

|                   |          |   |           |
|-------------------|----------|---|-----------|
| diet              | 127.1386 | 2 | <2.20E-16 |
| mito:nuclear      | 5.845    | 1 | 0.0156    |
| mito:diet         | 9.7233   | 2 | 0.0077    |
| nuclear:diet      | 10.8029  | 2 | 0.0045    |
| mito:nuclear:diet | 9.1987   | 2 | 0.0101    |

**Table S6. GLMM of fecundity across diets and mito-nuclear haplotypes – data pooled from Figure 2 and Figure 3c**

| Term              | $\chi^2$  | Df | Pr(> $\chi^2$ ) |
|-------------------|-----------|----|-----------------|
| (Intercept)       | 4338.6592 | 1  | <2.20E-16       |
| mito              | 1.7911    | 1  | 0.1808          |
| nuclear           | 9.8394    | 1  | 0.0017          |
| diet              | 500.2988  | 2  | <2.20E-16       |
| mito:nuclear      | 1.8161    | 1  | 0.1779          |
| mito:diet         | 14.5664   | 2  | 0.0006          |
| nuclear:diet      | 2.829     | 2  | 0.2430          |
| mito:nuclear:diet | 17.8267   | 2  | 0.0001          |

**Table S7. Fecundity after switch from experimental diets: GLMM of egg laying across mito-nuclear haplotypes, after feeding on experimental diets**

| Term        | $\chi^2$  | Df | Pr(> $\chi^2$ ) |
|-------------|-----------|----|-----------------|
| (Intercept) | 1341.3688 | 1  | <2.20E-16       |
| mito        | 2.6895    | 1  | 0.1010          |
| nuclear     | 0.0347    | 1  | 0.8522          |

|                   |        |   |          |
|-------------------|--------|---|----------|
| diet              | 36.59  | 2 | 1.13E-08 |
| mito:nuclear      | 3.7278 | 1 | 0.0535   |
| mito:diet         | 0.3195 | 2 | 0.8523   |
| nuclear:diet      | 1.7084 | 2 | 0.4256   |
| mito:nuclear:diet | 0.5948 | 2 | 0.7427   |

**Table S8. Rescue of fecundity after switch from experimental diets: GLMM of egg laying across mito-nuclear haplotypes: after feeding, relative to during feeding (binomial)**

| Term              | $\chi^2$ | Df | Pr(> $\chi^2$ ) |
|-------------------|----------|----|-----------------|
| (Intercept)       | 44.7143  | 1  | 2.28E-11        |
| mito              | 1.4802   | 1  | 0.2237          |
| nuclear           | 4.4348   | 1  | 0.0352          |
| diet              | 139.1165 | 2  | <2.20E-16       |
| mito:nuclear      | 0.1714   | 1  | 0.6788          |
| mito:diet         | 51.4892  | 2  | 6.60E-12        |
| nuclear:diet      | 17.9358  | 2  | 0.0001          |
| mito:nuclear:diet | 39.3128  | 2  | 2.91E-09        |

**Table S9. Fertility & development after parental feeding on experimental diets: sex-stratified posterior (EMM) analysis of adult emergence**

| Sex    | Term    | Df | F ratio | P      |
|--------|---------|----|---------|--------|
| female | mito    | 1  | 10.243  | 0.0014 |
|        | nuclear | 1  | 1.313   | 0.2518 |

|       |                   |   |       |        |
|-------|-------------------|---|-------|--------|
|       | diet              | 2 | 0.345 | 0.7083 |
|       | mito:nuclear      | 1 | 0.218 | 0.6407 |
|       | mito:diet         | 2 | 4.961 | 0.007  |
|       | nuclear:diet      | 2 | 0.777 | 0.4599 |
|       | mito:nuclear:diet | 2 | 3.477 | 0.0309 |
| <hr/> |                   |   |       |        |
|       | mito              | 1 | 9.262 | 0.0023 |
|       | nuclear           | 1 | 1.331 | 0.2486 |
|       | diet              | 2 | 0.396 | 0.6731 |
| male  | mito:nuclear      | 1 | 0.07  | 0.7913 |
|       | mito:diet         | 2 | 3.454 | 0.0316 |
|       | nuclear:diet      | 2 | 1.545 | 0.2133 |
|       | mito:nuclear:diet | 2 | 5.862 | 0.0028 |

**Table S10. Development after parental feeding on experimental diets: Cox Mixed-Effects model of egg-pupa survival**

| Term         | Chisq | Df      | Pr(> $\chi^2$ ) |
|--------------|-------|---------|-----------------|
| mito         | 1     | 3.8079  | 0.0510          |
| nuclear      | 1     | 13.3143 | 0.0003          |
| diet         | 2     | 10.8094 | 0.0045          |
| eggs         | 1     | 31.5515 | 1.94E-08        |
| mito:nuclear | 1     | 3.8928  | 0.0485          |

|                   |   |        |        |
|-------------------|---|--------|--------|
| mito:diet         | 2 | 5.5291 | 0.0630 |
| nuclear:diet      | 2 | 8.4317 | 0.0148 |
| mito:nuclear:diet | 2 | 1.717  | 0.4238 |



**Table S11. Fertility & development on experimental diets: Cox Mixed-Effects model of adult emergence**

| Term                  | Chisq | Df      | Pr(> $\chi^2$ ) |
|-----------------------|-------|---------|-----------------|
| mito                  | 1     | 75.1042 | <2.20E-16       |
| nuclear               | 1     | 65.8859 | 4.78E-16        |
| diet                  | 2     | 86.1542 | <2.20E-16       |
| sex                   | 1     | 12.9677 | 0.0003          |
| eggs                  | 1     | 1.7022  | 0.1920          |
| mito:nuclear          | 1     | 55.7929 | 8.05E-14        |
| mito:diet             | 2     | 86.1953 | <2.20E-16       |
| nuclear:diet          | 2     | 68.6659 | 1.23E-15        |
| mito:sex              | 1     | 14.1785 | 0.0002          |
| nuclear:sex           | 1     | 14.9357 | 0.0001          |
| diet:sex              | 2     | 12.8281 | 0.0016          |
| mito:nuclear:diet     | 2     | 51.4656 | 6.67E-12        |
| mito:nuclear:sex      | 1     | 13.8949 | 0.0002          |
| mito:diet:sex         | 2     | 25.9358 | 2.33E-06        |
| nuclear:diet:sex      | 2     | 11.5055 | 0.0032          |
| mito:nuclear:diet:sex | 2     | 16.6248 | 0.0002          |

**Table S12. Fertility & development after parental feeding on experimental diets: Cox Mixed-Effects model of adult emergence**

| Term                  | Chisq | Df      | Pr(> $\chi^2$ ) |
|-----------------------|-------|---------|-----------------|
| mito                  | 1     | 0.3711  | 0.5423          |
| nuclear               | 1     | 1.9887  | 0.1585          |
| diet                  | 2     | 10.3938 | 0.0055          |
| sex                   | 1     | 0.1665  | 0.6832          |
| eggs                  | 1     | 7.2316  | 0.0072          |
| mito:nuclear          | 1     | 0.2117  | 0.6454          |
| mito:diet             | 2     | 14.3708 | 0.0008          |
| nuclear:diet          | 2     | 6.0394  | 0.0488          |
| mito:sex              | 1     | 1.517   | 0.2181          |
| nuclear:sex           | 1     | 1.4268  | 0.2323          |
| diet:sex              | 2     | 2.9565  | 0.2280          |
| mito:nuclear:diet     | 2     | 6.9531  | 0.0309          |
| mito:nuclear:sex      | 1     | 0.565   | 0.4522          |
| mito:diet:sex         | 2     | 0.2748  | 0.8716          |
| nuclear:diet:sex      | 2     | 1.0484  | 0.5920          |
| mito:nuclear:diet:sex | 2     | 6.6992  | 0.0351          |

Figure S1

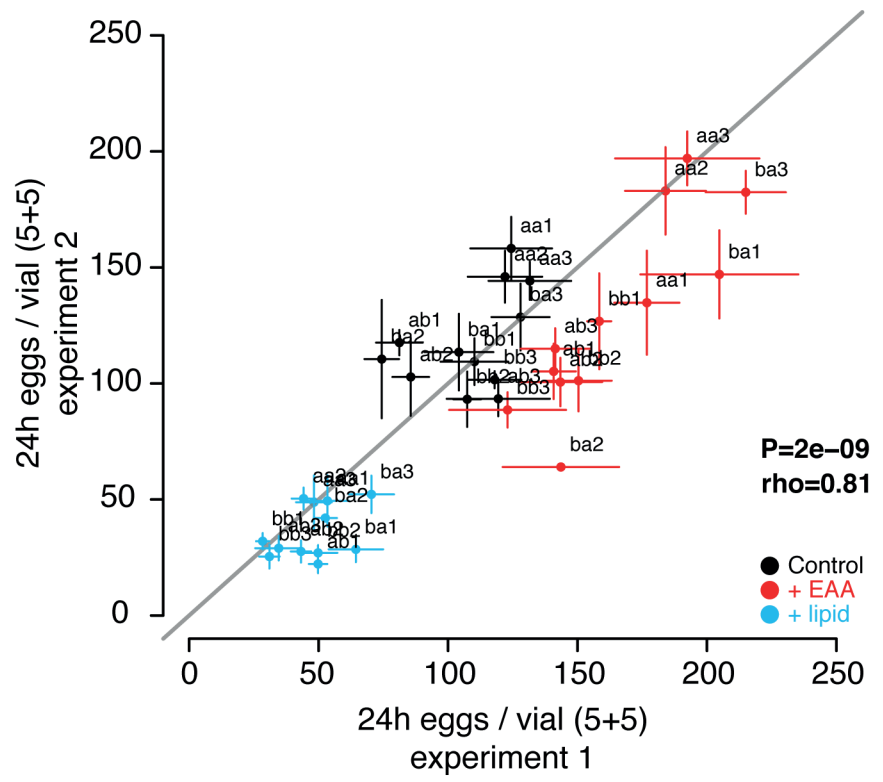

**Figure S1. Diet-mito-nuclear interactions modulate *Drosophila* fecundity.**

Genetic correlations in impact of mito-nuclear variation on egg laying, and impact of diet on egg laying. Each point shows mean egg laying per line per diet in each of two replicate experiments. Bars show standard error. Accompanying statistical analysis presented in Table S1 and Table S2.

Figure S2

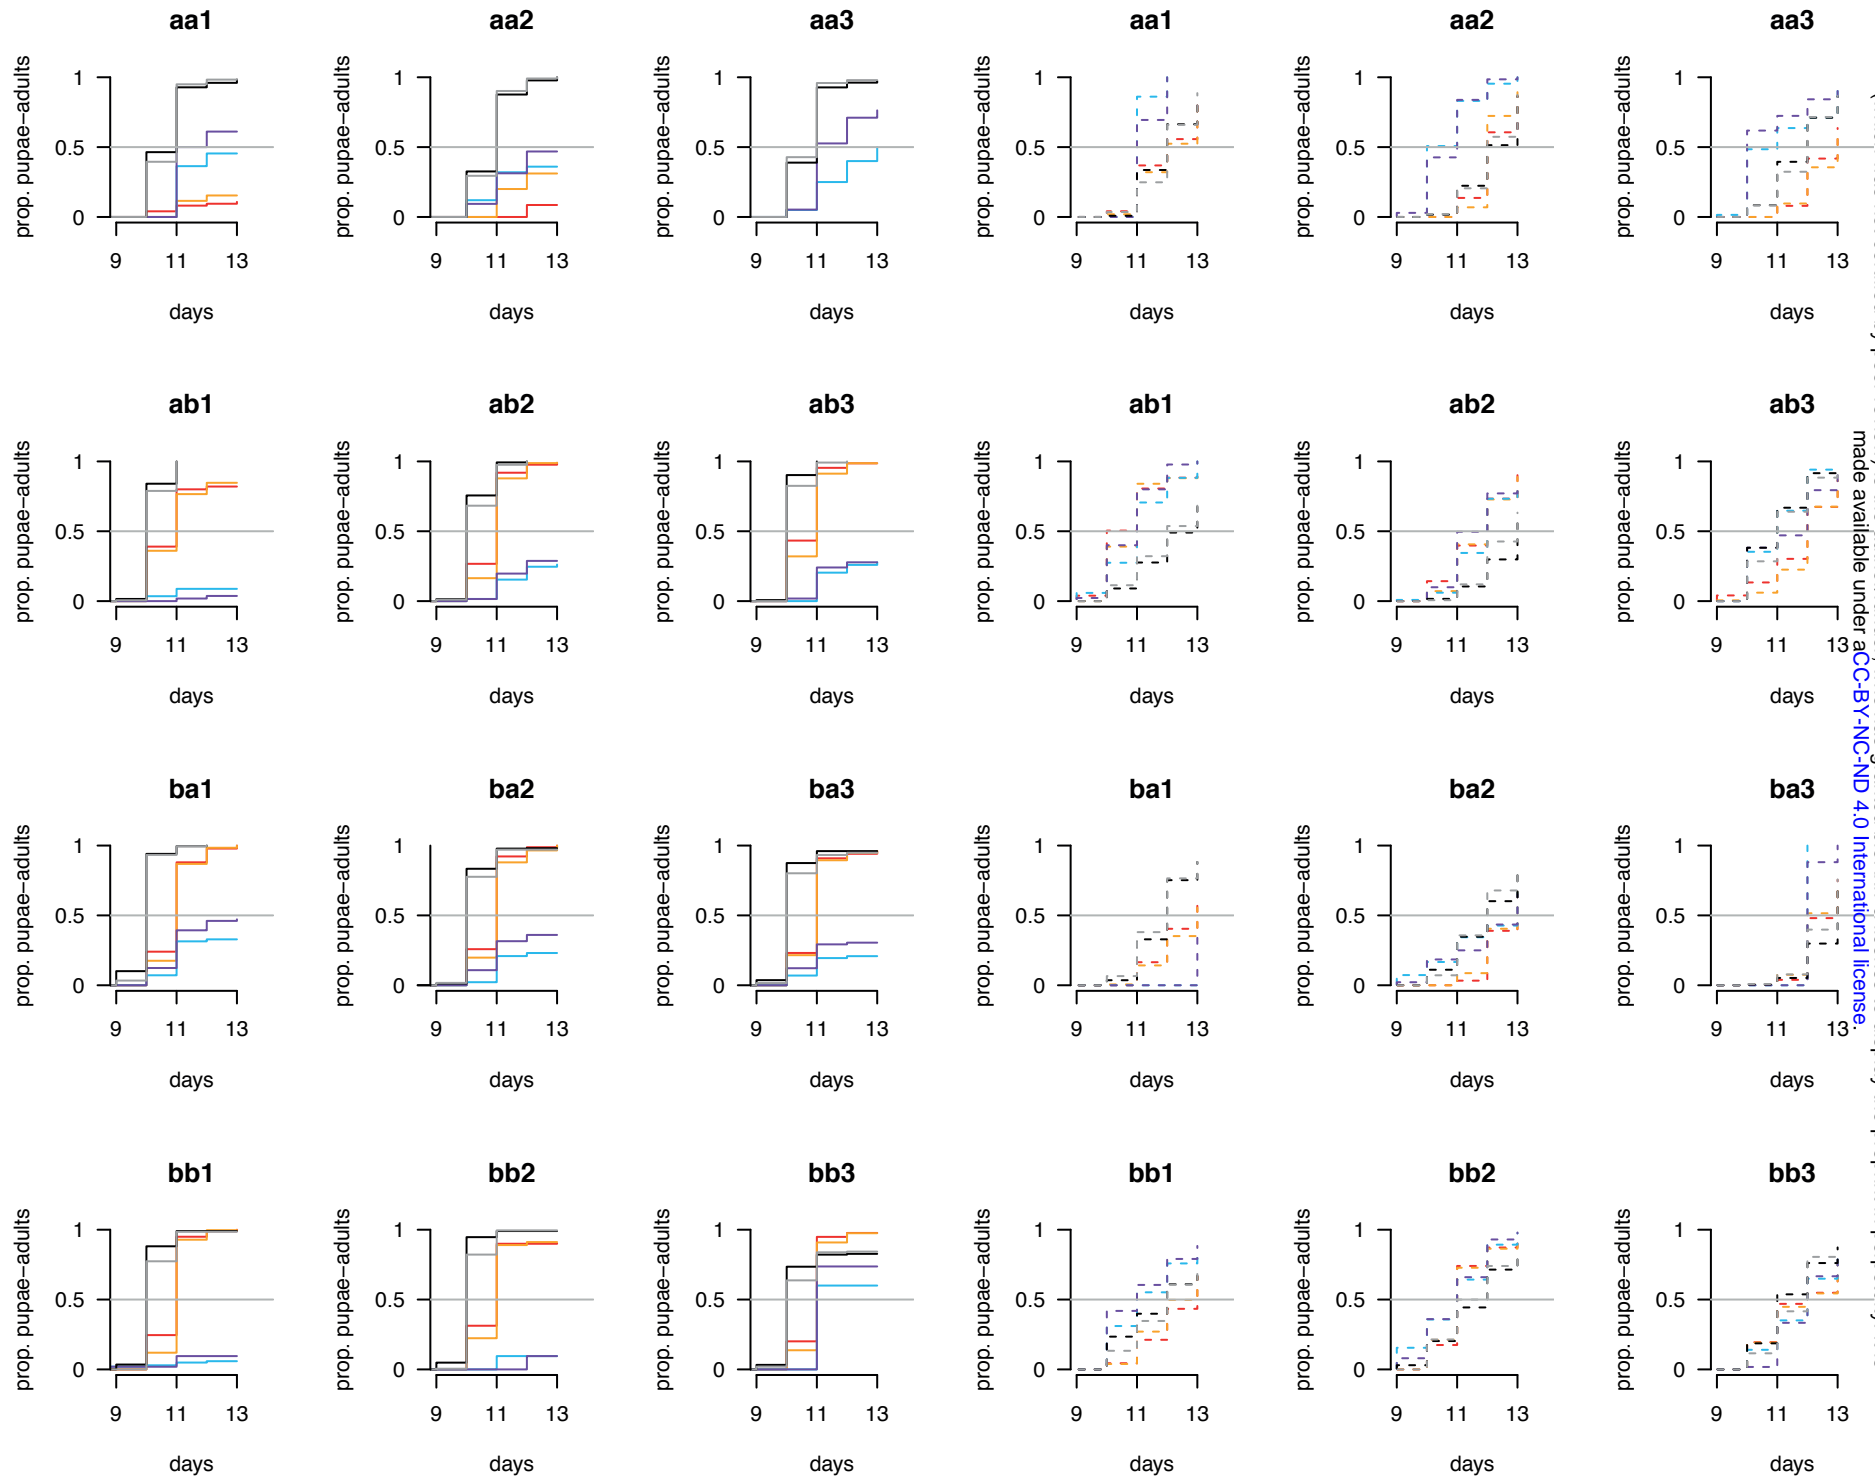

bioRxiv preprint doi: <https://doi.org/10.1101/2021.03.07.434274>; this version posted March 8, 2021. The copyright holder for this preprint (which was not certified by peer review) is the author/funder, who has granted bioRxiv a license to display the preprint in perpetuity. It is made available under aCC-BY-NC-ND 4.0 International license.

**Figure S2. Mito-nuclear variation in dietary regulation of adult development:**

**impacts per genetic replicate.** Kaplan-Meier plots of development after feeding on experimental diets as specified in key. Mito-nuclear genotypes are indicated per panel. Data are presented pooled across each replicate genotype in Figure 4.

Accompanying statistical analysis presented in Table S3.

**Figure S3**

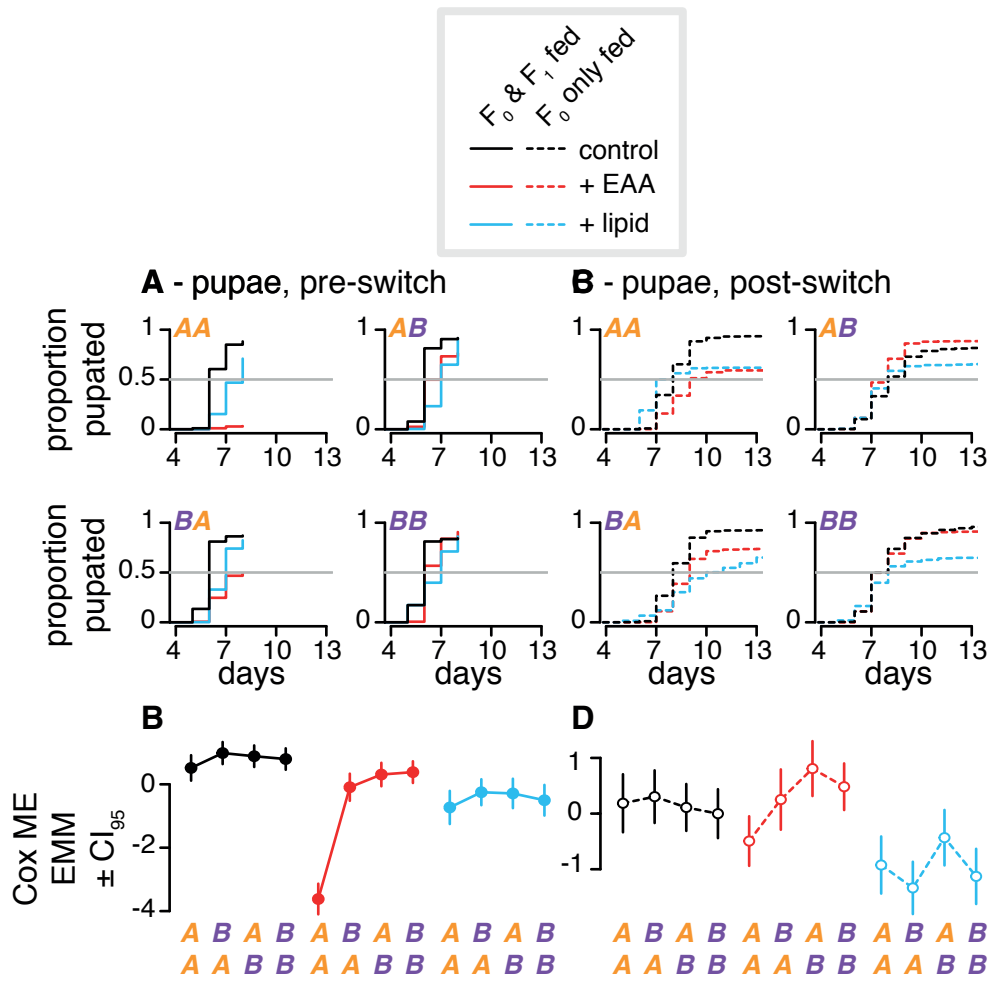

**Figure S3. Mito-nuclear variation in dietary regulation of pupation.** **(A)** Kaplan-Meier plots of pupation after feeding on experimental diets as specified in key. Mito-nuclear genotypes are indicated in top-left of each panel. **(B)**. Estimated marginal means (EMMs) with 95% confidence intervals summarising survival analysis (Cox mixed effects) of data from A. Higher values correspond to faster development and/or increased fertility, lower values correspond to slower development and/or reduced viability. Data are presented per genetic replicate in Figure S4. Accompanying statistical analysis presented in Table S4.



Figure S4

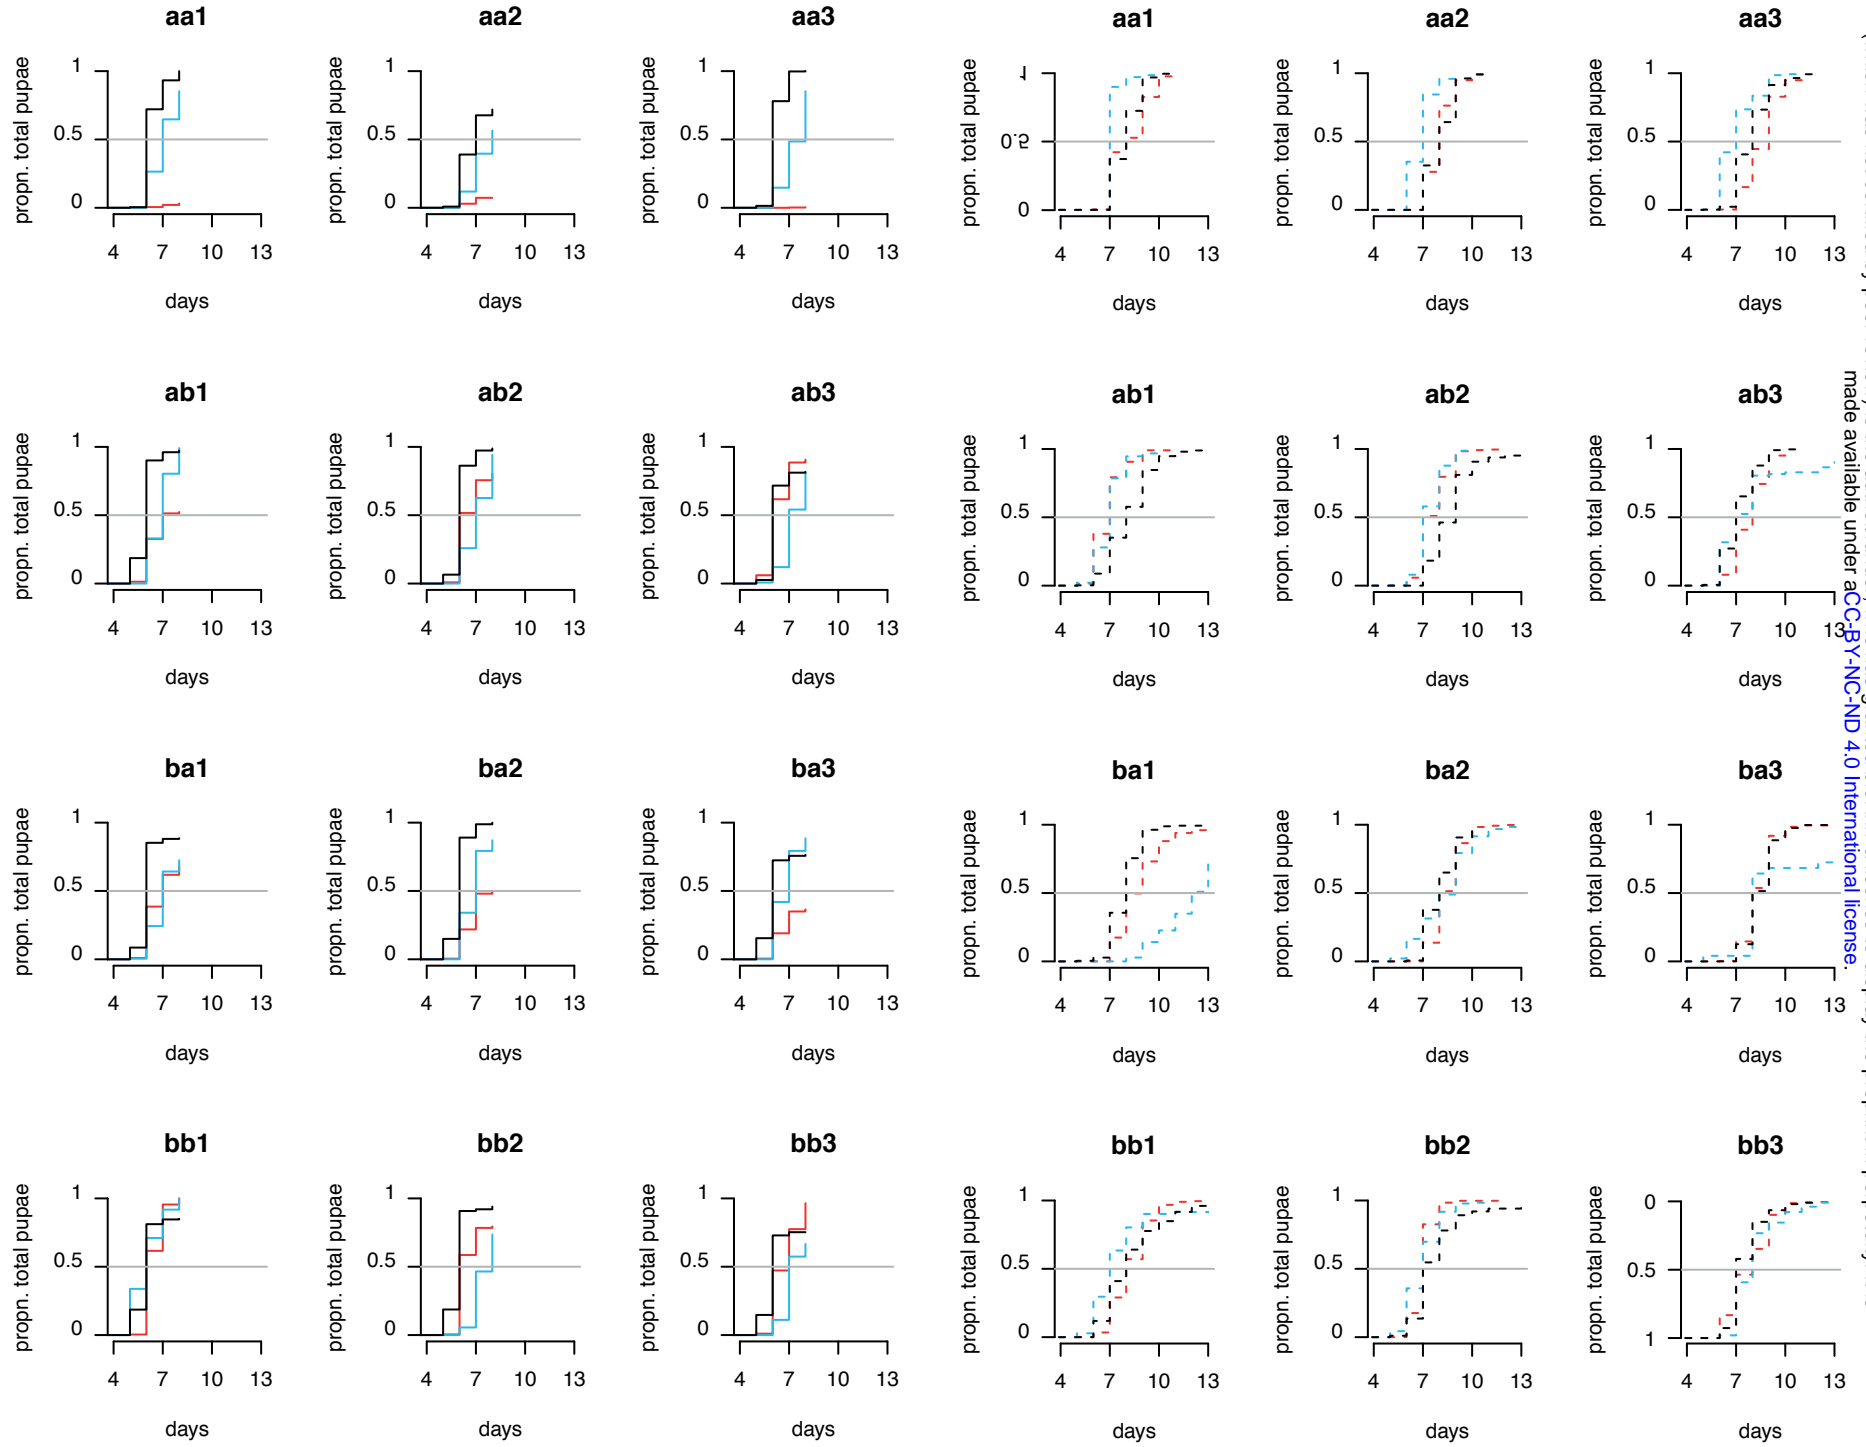

bioRxiv preprint doi: <https://doi.org/10.1101/2021.03.07.434274>; this version posted March 8, 2021. The copyright holder for this preprint (which was not certified by peer review) is the author/funder, who has granted bioRxiv a license to display the preprint in perpetuity. It is made available under aCC-BY-NC-ND 4.0 International license.

**Figure S4. Mito-nuclear variation in dietary regulation of pupation: impacts per genetic replicate.** Kaplan-Meier plots of pupation after feeding on experimental diets as specified in key. Mito-nuclear genotypes are indicated per panel. Data are presented pooled across each replicate genotype in Figure S5. Accompanying statistical analysis presented in Table S4 and Table S10

Figure S5

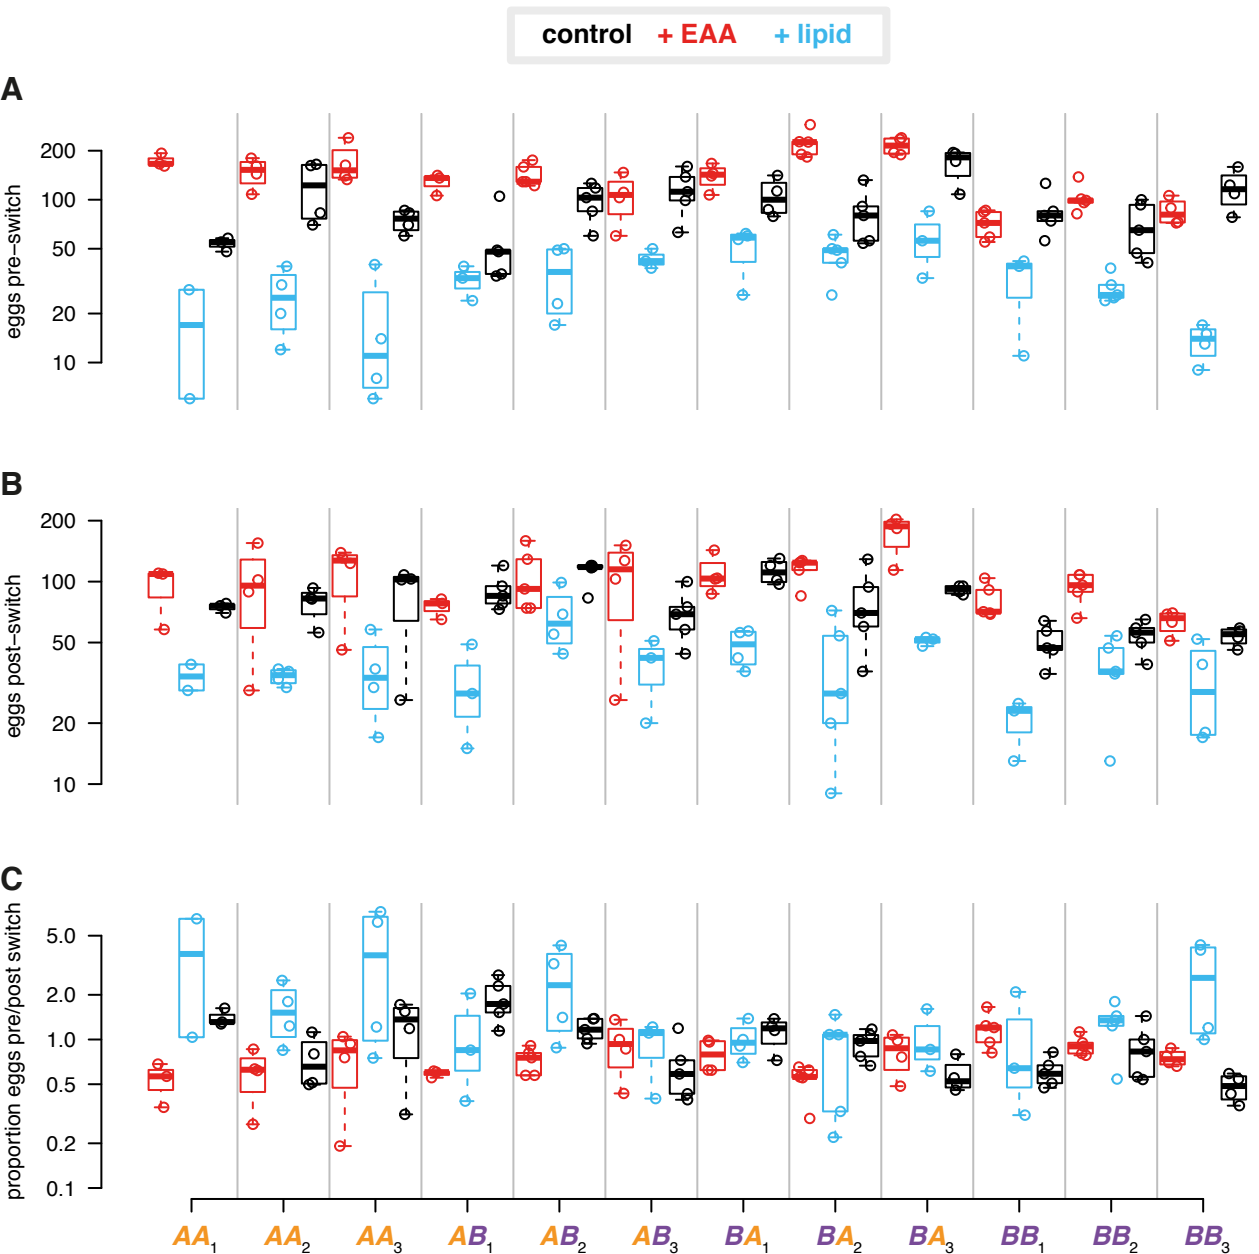

**Figure S5. Mito-nuclear variation in fecundity response to switching from experimental diets to a standardised diet: impacts per genetic replicate.**

Fecundity measures are shown per genotype as specified on bottom x axis. Boxplots show medians, first and third quartiles and 5th and 95th percentiles. Points show individual data. **A.** Fecundity before diet switch. **B.** Fecundity after diet switch. **C.** Ratio of fecundity before and after diet switch. Data are presented pooled across each replicate genotype in Figure 3. Accompanying statistical analysis presented in Tables S5, S7 and S8.

Figure S6

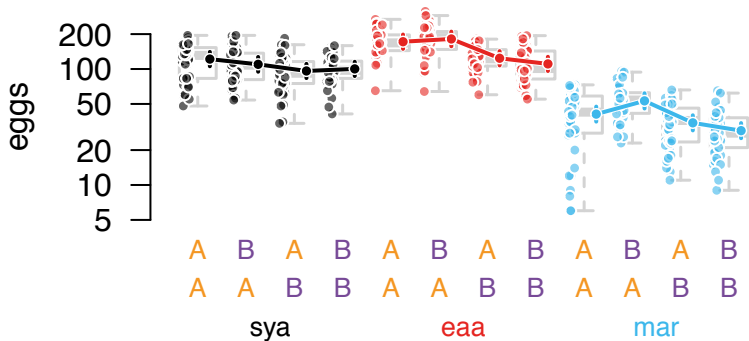

**Figure S6. Diet-mito-nuclear interactions modulate *Drosophila* fecundity - emergent pattern from three replicate experiments.** Fecundity is shown per genotype as specified on bottom x axis. Boxplots show medians, first and third quartiles and 5th and 95th percentiles. Connected points to right of each box show *post-hoc* comparisons of means (by estimated marginal means with 95% confidence intervals, calculated from a generalised linear mixed effects model, showing exponent of EMMs in order to fit to original data scale). Translucent points to left of each box show raw data. Accompanying statistical analysis presented in Table S6.

## Supplementary Text

Much recent research in *Drosophila* and other organisms has been directed to characterising the consequences transmission of mitochondria from mothers only, which restricts mito-nuclear coevolution to females (Gemmell et al., 2004; Maklakov and Lummaa, 2013; Montooth et al., 2019; Nagarajan-Radha et al., 2020). This is thought to cause a “mother’s curse” (Gemmell et al., 2004), in which males bear their mothers' mitochondria despite potential mismatch to variants inherited from fathers. In our study of development we manipulated diet and mito-nuclear genotype, and recorded sex of emerging adult offspring, giving four potential predictive factors. Our main analyses are presented stratified by sex. ANOVA tests of the complex diet:mito:nuclear:sex interaction were nominally supportive of sex biases in DMN interactions, but did not point solely to males. We detected significant sex:diet:mito:nuclear interactions, but even with our large sample sizes we are cautious in interpreting such complex interaction terms. F-ratios for DMN interactions were greater in males when only parents were fed experimental diets (Table S12), but were greater in females when both F0+F1 were fed experimental diets (Table S11), suggesting that sex dimorphisms manifest as different magnitudes of the same interaction. Visual inspection of the data led to a similar conclusion (Figure S2). We therefore interpret that any statistical differences reflected relatively modest differences in the present data, suggesting that mothers curse may exert a relatively benign influence in this case.
